# Supplementary material for: GRACE storage-runoff hystereses reveal the dynamics of regional watersheds
Source: Copernicus journal article supplement (doi:10.5194/hess-19-3253-2015), 2015-07-28
Supplement: Supplementary file 1 [file hess-19-3253-2015-supplement.zip]

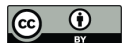

*Supplement of*

## **GRACE storage-runoff hystereses reveal the dynamics of regional watersheds**

**E. A. Sproles et al.**

*Correspondence to:* E. A. Sproles ([eric.sproles@gmail.com](mailto:eric.sproles@gmail.com))

- [hess-19-3253-2015-supplement-title-page.pdf](#)
- [Sproles\\_etal\\_data.xlsx](#)

The copyright of individual parts of the supplement might differ from the CC-BY 3.0 licence.
