# Supplementary material for: GRACE storage-runoff hystereses reveal the dynamics of regional watersheds
Source: Copernicus journal article supplement (doi:10.5194/hess-19-3253-2015), 2015-07-28
Supplement: Supplementary file 1 [file Sproles_etal_data.xlsx]

## Sheet: SWE
					THE DALLES						Upper Columbia						The Snake
GRACE	Year	Month	Q	TWS	GLDAS SNOW DAL	from norm GLDAS SNOW DAL	NLDAS SNOW DAL	from norm NLDAS SNOW DAL	ensemble SNOW DAL		GLDAS SNOW UPC	from norm GLDAS SNOW UPC	NLDAS SNOW UPC	from norm NLDAS SNOW UPC	ensemble SNOW UPC		GLDAS SNOW SNK	from norm GLDAS SNOW SNK	NLDAS SNOW SNK	from norm NLDAS SNOW UPC	ensemble SNOW SNK
1	2003	1	5.23072	-35	23	8.63248	51.082	14.414	11.5232		46	21.2051	96.534	23.5016	22.3534		9	3.42735	34.5889	13.001	8.2142
1	2003	2	4.72837	57	27	12.6325	72.3555	35.6874	24.1599		56	31.2051	143.685	70.6521	50.9286		10	4.42735	44.3027	22.7149	13.5711
1	2003	3	5.29887	47	24	9.63248	87.731	51.0629	30.3477		56	31.2051	182.352	109.32	70.2626		6	0.42735	48.2391	26.6513	13.5393
1	2003	4	5.37527	76	12	-2.36752	62.7729	26.1049	11.8687		29	4.20513	141.207	68.1742	36.1897		2	-3.57265	28.7947	7.20684	1.8171
1	2003	5	7.22419	22	2	-12.3675	18.4577	-18.2103	-15.2889		3	-21.7949	43.6092	-29.4232	-25.609		1	-4.57265	7.6075	-13.9803	-9.27648
-10	2003	6	5.90703	NaN	0	-14.3675	0.561205	-36.1068	-25.2372		0	-24.7949	1.07597	-71.9565	-48.3757		0	-5.57265	0.197815	-21.39	-13.4813
1	2003	7	3.42638	-47	0	-14.3675	0.0171167	-36.6509	-25.5092		0	-24.7949	0.005464	-73.027	-48.9109		0	-5.57265	0.00067963	-21.5871	-13.5799
1	2003	8	3.90302	-89	0	-14.3675	0.000837536	-36.6672	-25.5174		0	-24.7949	0.0018255	-73.0306	-48.9127		0	-5.57265	0.000595428	-21.5872	-13.5799
1	2003	9	4.07845	-108	0	-14.3675	0.0447231	-36.6233	-25.4954		0	-24.7949	0.135862	-72.8966	-48.8457		0	-5.57265	0.00867685	-21.5791	-13.5759
1	2003	10	4.47678	-131	1	-13.3675	0.394455	-36.2736	-24.8206		3	-21.7949	1.13081	-71.9016	-46.8482		0	-5.57265	0.093162	-21.4946	-13.5336
1	2003	11	4.36535	-110	7	-7.36752	14.7205	-21.9475	-14.6575		15	-9.79487	30.1895	-42.843	-26.3189		3	-2.57265	9.8529	-11.7349	-7.15378
1	2003	12	4.43419	-59	21	6.63248	49.7143	13.0463	9.83939		45	20.2051	99.5892	26.5568	23.381		7	1.42735	29.6621	8.07429	4.75082
1	2004	1	4.31066	18	35	20.6325	88.5301	51.8621	36.2473		62	37.2051	145.974	72.9414	55.0733		16	10.4274	72.3794	50.7916	30.6095
1	2004	2	4.67066	44	40	25.6325	110.365	73.6965	49.6645		77	52.2051	194.321	121.289	86.747		18	12.4274	84.5126	62.9248	37.6761
1	2004	3	6.59378	66	24	9.63248	97.2824	60.6143	35.1234		55	30.2051	196.343	123.311	76.7579		8	2.42735	60.4438	38.856	20.6417
1	2004	4	4.95069	29	6	-8.36752	39.2671	2.59901	-2.88426		16	-8.79487	95.5311	22.4986	6.85188		0	-5.57265	14.8021	-6.78572	-6.17918
1	2004	5	5.57575	26	1	-13.3675	5.0569	-31.6111	-22.4893		2	-22.7949	12.5448	-60.4876	-41.6412		0	-5.57265	1.92444	-19.6634	-12.618
1	2004	6	4.77756	31	0	-14.3675	0.327221	-36.3408	-25.3542		0	-24.7949	0.313992	-72.7184	-48.7567		0	-5.57265	0.2474	-21.3404	-13.4565
1	2004	7	3.42766	-40	0	-14.3675	0.00535632	-36.6627	-25.5151		0	-24.7949	0.003666	-73.0288	-48.9118		0	-5.57265	0.000931481	-21.5869	-13.5798
1	2004	8	3.71645	-100	0	-14.3675	0.00119068	-36.6669	-25.5172		0	-24.7949	0.00110988	-73.0313	-48.9131		0	-5.57265	0.00195029	-21.5859	-13.5793
1	2004	9	3.85379	-81	0	-14.3675	0.0213503	-36.6467	-25.5071		0	-24.7949	0.038171	-72.9943	-48.8946		0	-5.57265	0.0198786	-21.5679	-13.5703
1	2004	10	4.45123	-80	1	-13.3675	1.37997	-35.2881	-24.3278		3	-21.7949	3.68905	-69.3434	-45.5691		1	-4.57265	0.70979	-20.878	-12.7253
1	2004	11	4.23756	-53	6	-8.36752	10.6133	-26.0547	-17.2111		16	-8.79487	29.0827	-43.9497	-26.3723		2	-3.57265	3.66435	-17.9235	-10.7481
1	2004	12	4.2851	-37	16	1.63248	33.922	-2.74604	-0.556782		37	12.2051	76.4951	3.46264	7.83389		5	-0.57265	17.9485	-3.6393	-2.10597
1	2005	1	4.07979	18	27	12.6325	62.9983	26.3303	19.4814		58	33.2051	122.184	49.1519	41.1785		13	7.42735	47.4209	25.8331	16.6302
1	2005	2	3.63496	19	24	9.63248	67.7748	31.1068	20.3696		59	34.2051	142.882	69.8491	52.0271		10	4.42735	48.0591	26.4713	15.4493
1	2005	3	4.62161	22	15	0.632479	55.0001	18.332	9.48225		44	19.2051	126.84	53.8072	36.5062		4	-1.57265	37.0355	15.4477	6.93751
1	2005	4	4.4684	42	9	-5.36752	41.8644	5.19637	-0.0855776		28	3.20513	102.714	29.6811	16.4431		2	-3.57265	24.5174	2.9296	-0.321526
1	2005	5	8.255	58	1	-13.3675	5.91866	-30.7494	-22.0585		2	-22.7949	14.362	-58.6704	-40.7326		0	-5.57265	4.5943	-16.9935	-11.2831
1	2005	6	4.74046	30	0	-14.3675	0.137028	-36.531	-25.4493		0	-24.7949	0.076672	-72.9557	-48.8753		0	-5.57265	0.287544	-21.3003	-13.4365
1	2005	7	3.61039	-34	0	-14.3675	0.00161798	-36.6664	-25.517		0	-24.7949	0.003203	-73.0292	-48.912		0	-5.57265	0.00118108	-21.5866	-13.5796
1	2005	8	3.47025	-45	0	-14.3675	0.00260262	-36.6654	-25.5165		0	-24.7949	0.00441844	-73.028	-48.9114		0	-5.57265	0.00243218	-21.5854	-13.579
1	2005	9	3.78454	-102	0	-14.3675	0.0189396	-36.6491	-25.5083		0	-24.7949	0.042845	-72.9896	-48.8922		0	-5.57265	0.0132853	-21.5745	-13.5736
1	2005	10	4.62161	-88	1	-13.3675	0.307322	-36.3607	-24.8641		1	-23.7949	0.898174	-72.1342	-47.9646		0	-5.57265	0.0777046	-21.5101	-13.5414
1	2005	11	4.75695	-73	6	-8.36752	14.6739	-21.9941	-15.1808		12	-12.7949	30.0646	-42.9679	-27.8814		2	-3.57265	7.90474	-13.6831	-8.62786
1	2005	12	5.43092	-7	19	4.63248	43.8109	7.14289	5.88769		29	4.20513	71.1401	-1.89231	1.15641		12	6.42735	33.5797	11.9919	9.20962
1	2006	1	7.84608	41	32	17.6325	81.6231	44.9551	31.2938		48	23.2051	136.771	63.7389	43.472		20	14.4274	64.9428	43.355	28.8912
1	2006	2	7.72544	112	39	24.6325	116.538	79.8696	52.251		61	36.2051	201.538	128.505	82.3552		22	16.4274	86.4133	64.8255	40.6264
1	2006	3	12.2206	117	33	18.6325	122.425	85.7571	52.1948		60	35.2051	227.825	154.793	94.9988		13	7.42735	80.7569	59.1691	33.2982
1	2006	4	23.6157	136	11	-3.36752	81.8935	45.2254	20.929		16	-8.79487	155.105	82.0726	36.6388		6	0.42735	56.8655	35.2777	17.8525
1	2006	5	18.9124	103	1	-13.3675	19.8776	-16.7904	-15.079		1	-23.7949	37.2231	-35.8093	-29.8021		0	-5.57265	14.4355	-7.15234	-6.3625
1	2006	6	8.40505	64	0	-14.3675	0.726437	-35.9416	-25.1546		0	-24.7949	0.395328	-72.6371	-48.716		0	-5.57265	0.596504	-20.9913	-13.282
1	2006	7	4.907	0	0	-14.3675	0.0432529	-36.6248	-25.4962		0	-24.7949	0.000816	-73.0316	-48.9132		0	-5.57265	0.000477778	-21.5873	-13.58
1	2006	8	4.49808	-46	0	-14.3675	0.00257678	-36.6655	-25.5165		0	-24.7949	0.00409388	-73.0283	-48.9116		0	-5.57265	0.00278304	-21.585	-13.5788
1	2006	9	4.58794	-69	0	-14.3675	0.0529818	-36.6151	-25.4913		0	-24.7949	0.11855	-72.9139	-48.8544		0	-5.57265	0.0312238	-21.5566	-13.5646
1	2006	10	4.94107	-67	1	-13.3675	0.683336	-35.9847	-24.6761		1	-23.7949	1.61233	-71.4201	-47.6075		0	-5.57265	0.56626	-21.0215	-13.2971
1	2006	11	4.60855	-30	8	-6.36752	16.9044	-19.7636	-13.0656		20	-4.79487	38.2495	-34.7829	-19.7889		2	-3.57265	7.81021	-13.7776	-8.67512
1	2006	12	5.2222	-14	22	7.63248	55.2717	18.6037	13.1181		44	19.2051	114.32	41.2872	30.2462		7	1.42735	24.4698	2.88195	2.15465
1	2007	1	5.33721	31	37	22.6325	95.6776	59.0096	40.821		74	49.2051	190.917	117.885	83.545		13	7.42735	46.9809	25.3931	16.4102
1	2007	2	4.86687	58	36	21.6325	109.996	73.3276	47.48		83	58.2051	234.34	161.307	109.756		8	2.42735	48.3305	26.7427	14.585
1	2007	3	5.71631	57	27	12.6325	112.37	75.7021	44.1673		67	42.2051	252.983	179.951	111.078		3	-2.57265	43.9684	22.3806	9.90399
1	2007	4	4.88474	61	12	-2.36752	77.1468	40.4788	19.0556		31	6.20513	194.229	121.196	63.7007		1	-4.57265	22.9627	1.37492	-1.59887
1	2007	5	5.09868	61	1	-13.3675	23.6452	-13.0228	-13.1952		4	-20.7949	63.3372	-9.69527	-15.2451		0	-5.57265	4.55102	-17.0368	-11.3047
1	2007	6	3.61677	32	0	-14.3675	1.15861	-35.5094	-24.9385		0	-24.7949	2.60675	-70.4257	-47.6103		0	-5.57265	0.204237	-21.3836	-13.4781
1	2007	7	3.61422	-49	0	-14.3675	0.0488368	-36.6192	-25.4934		0	-24.7949	0.000104	-73.0323	-48.9136		0	-5.57265	0.000177778	-21.5876	-13.5801
1	2007	8	3.7254	-70	0	-14.3675	0.00215799	-36.6659	-25.5167		0	-24.7949	0.0041535	-73.0283	-48.9116		0	-5.57265	0.00180069	-21.586	-13.5793
1	2007	9	3.89089	-95	0	-14.3675	0.0263677	-36.6417	-25.5046		0	-24.7949	0.0589259	-72.9735	-48.8842		0	-5.57265	0.0181196	-21.5697	-13.5712
1	2007	10	4.6429	-108	1	-13.3675	0.625996	-36.042	-24.7048		3	-21.7949	1.38684	-71.6456	-46.7202		0	-5.57265	0.363391	-21.2244	-13.3985
1	2007	11	4.43955	-67	6	-8.36752	9.88142	-26.7866	-17.5771		13	-11.7949	21.1241	-51.9084	-31.8516		2	-3.57265	3.84518	-17.7426	-10.6576
1	2007	12	4.60883	-29	30	15.6325	42.5439	5.87589	10.7542		48	23.2051	80.0788	7.04635	15.1257		12	6.42735	21.2751	-0.312705	3.05732
1	2008	1	4.32344	37	59	44.6325	93.8605	57.1925	50.9125		80	55.2051	153.779	80.7471	67.9761		25	19.4274	59.8744	38.2865	28.8569
1	2008	2	4.01661	85	70	55.6325	139.207	102.539	79.0859		95	70.2051	227.219	154.187	112.196		28	22.4274	95.6043	74.0165	48.2219
1	2008	3	5.74613	82	42	27.6325	128.109	91.4414	59.5369		70	45.2051	235.226	162.193	103.699		12	6.42735	79.9676	58.3798	32.4036
1	2008	4	5.72565	81	25	10.6325	109.157	72.489	41.5607		43	18.2051	212.302	139.269	78.7373		4	-1.57265	62.7344	41.1466	19.787
1	2008	5	9.38804	72	5	-9.36752	33.7134	-2.95465	-6.16109		6	-18.7949	69.9339	-3.0985	-10.9467		0	-5.57265	17.0529	-4.53492	-5.05378
1	2008	6	7.30031	35	0	-14.3675	1.16118	-35.5069	-24.9372		0	-24.7949	0.783152	-72.2493	-48.5221		0	-5.57265	0.938519	-20.6493	-13.111
1	2008	7	4.40011	-39	0	-14.3675	0.0798172	-36.5882	-25.4779		0	-24.7949	0.001484	-73.0309	-48.9129		0	-5.57265	0.00395556	-21.5839	-13.5783
1	2008	8	4.5066	-73	0	-14.3675	0.00257464	-36.6655	-25.5165		0	-24.7949	0.006218	-73.0262	-48.9105		0	-5.57265	0.00129288	-21.5865	-13.5796
1	2008	9	4.11348	-86	0	-14.3675	0.0105797	-36.6575	-25.5125		0	-24.7949	0.0245405	-73.0079	-48.9014		0	-5.57265	0.00634659	-21.5815	-13.5771
1	2008	10	4.74513	-78	1	-13.3675	0.574914	-36.0931	-24.7303		2	-22.7949	1.10523	-71.9272	-47.361		0	-5.57265	0.577215	-21.0106	-13.2916
1	2008	11	4.49313	-63	4	-10.3675	5.26356	-31.4045	-20.886		8	-16.7949	12.308	-60.7244	-38.7596		1	-4.57265	3.27583	-18.312	-11.4423
1	2008	12	4.349	-26	19	4.63248	32.2574	-4.41063	0.110922		29	4.20513	57.5098	-15.5226	-5.65873		9	3.42735	21.7104	0.122591	1.77497
1	2009	1	4.35752	17	44	29.6325	92.93	56.262	42.9472		66	41.2051	149.215	76.1828	58.6939		19	13.4274	65.3442	43.7564	28.5919
1	2009	2	3.70537	28	39	24.6325	98.2012	61.5332	43.0828		63	38.2051	180.246	107.214	72.7094		16	10.4274	61.234	39.6462	25.0368
1	2009	3	5.15831	73	31	16.6325	101.204	64.5356	40.584		55	30.2051	202.738	129.706	79.9555		6	0.42735	51.1039	29.516	14.9717
1	2009	4	8.2855	87	12	-2.36752	74.895	38.2269	17.9297		20	-4.79487	155.817	82.7845	38.9948		2	-3.57265	35.4573	13.8695	5.14842
1	2009	5	10.2399	73	1	-13.3675	21.7945	-14.8736	-14.1205		1	-23.7949	48.8052	-24.2272	-24.011		0	-5.57265	8.98917	-12.5986	-9.08564
1	2009	6	10.3589	51	0	-14.3675	0.456398	-36.2116	-25.2896		0	-24.7949	0.517552	-72.5149	-48.6549		0	-5.57265	0.145711	-21.4421	-13.5074
1	2009	7	6.13801	-5	0	-14.3675	0.0210006	-36.647	-25.5073		0	-24.7949	0.001398	-73.031	-48.9129		0	-5.57265	0.000735185	-21.5871	-13.5799
1	2009	8	4.24975	-31	0	-14.3675	0.00125357	-36.6668	-25.5172		0	-24.7949	0.00169513	-73.0307	-48.9128		0	-5.57265	0.00160556	-21.5862	-13.5794
1	2009	9	4.21695	-76	0	-14.3675	0.00739659	-36.6606	-25.5141		0	-24.7949	0.0138707	-73.0186	-48.9067		0	-5.57265	0.00364653	-21.5842	-13.5784
1	2009	10	5.26054	-51	2	-12.3675	1.29498	-35.3731	-23.8703		4	-20.7949	3.24992	-69.7825	-45.2887		1	-4.57265	0.707788	-20.88	-12.7263
1	2009	11	4.72397	-53	11	-3.36752	12.2946	-24.3735	-13.8705		18	-6.79487	30.9503	-42.0821	-24.4385		2	-3.57265	3.74701	-17.8408	-10.7067
1	2009	12	5.10294	-34	27	12.6325	34.0996	-2.56848	5.032		39	14.2051	77.6108	4.57833	9.39173		12	6.42735	15.3841	-6.20373	0.111808
1	2010	1	5.6013	-11	51	36.6325	62.1746	25.5066	31.0695		71	46.2051	124.753	51.7209	48.963		25	19.4274	38.0874	16.4996	17.9635
1	2010	2	4.90535	30	52	37.6325	76.338	39.67	38.6512		75	50.2051	148.689	75.6565	62.9308		28	22.4274	50.5597	28.9719	25.6996
1	2010	3	5.85688	64	32	17.6325	61.9438	25.2757	21.4541		49	24.2051	130.059	57.0268	40.616		10	4.42735	34.6482	13.0604	8.74388
1	2010	4	5.69268	35	16	1.63248	41.0767	4.4087	3.02059		22	-2.79487	91.5836	18.5512	7.87815		3	-2.57265	20.4241	-1.16372	-1.86818
1	2010	5	7.04955	55	3	-11.3675	9.154	-27.514	-19.4408		2	-22.7949	18.7373	-54.2951	-38.545		0	-5.57265	4.14107	-17.4467	-11.5097
1	2010	6	10.6392	56	0	-14.3675	0.701867	-35.9662	-25.1668		0	-24.7949	0.213472	-72.8189	-48.8069		0	-5.57265	0.209096	-21.3787	-13.4757
1	2010	7	4.23782	5	0	-14.3675	0.098823	-36.5692	-25.4684		0	-24.7949	0.002848	-73.0296	-48.9122		0	-5.57265	0.000925926	-21.5869	-13.5798
1	2010	8	3.70666	-50	0	-14.3675	0.00250544	-36.6655	-25.5165		0	-24.7949	0.0057205	-73.0267	-48.9108		0	-5.57265	0.00124994	-21.5866	-13.5796
1	2010	9	4.20871	-63	0	-14.3675	0.0309064	-36.6371	-25.5023		0	-24.7949	0.0961407	-72.9363	-48.8656		0	-5.57265	0.00498796	-21.5828	-13.5777
1	2010	10	5.14127	-74	0	-14.3675	0.406631	-36.2614	-25.3145		1	-23.7949	0.76445	-72.268	-48.0314		0	-5.57265	0.363663	-21.2241	-13.3984
1	2010	11	4.76932	-44	8	-6.36752	10.9693	-25.6988	-16.0331		11	-13.7949	19.448	-53.5844	-33.6896		5	-0.57265	9.53313	-12.0547	-6.31367
1	2010	12	5.06034	0	40	25.6325	54.5827	17.9147	21.7736		46	21.2051	84.4148	11.3824	16.2938		30	24.4274	48.0286	26.4408	25.4341
-10	2011	1	7.5181	NaN	70	55.6325	95.8352	59.1672	57.3998		88	63.2051	159.46	86.4275	74.8163		47	41.4274	78.1273	56.5395	48.9834
1	2011	2	6.16727	79	74	59.6325	121.003	84.3346	71.9835		116	91.2051	229.969	156.936	124.071		40	34.4274	81.6527	60.0649	47.2461
1	2011	3	9.65639	110	70	55.6325	138.646	101.977	78.805		116	91.2051	275.187	202.154	146.68		32	26.4274	82.8178	61.23	43.8287
1	2011	4	17.4902	141	39	24.6325	125.654	88.9855	56.809		68	43.2051	262.699	189.666	116.436		12	6.42735	73.3306	51.7428	29.0851
1	2011	5	22.1752	168	9	-5.36752	59.8021	23.134	8.88325		14	-10.7949	124.109	51.0766	20.1409		2	-3.57265	36.6384	15.0506	5.73896
-10	2011	6	19.2545	NaN	0	-14.3675	6.59609	-30.072	-22.2197		0	-24.7949	8.40934	-64.6231	-44.709		0	-5.57265	5.6136	-15.9742	-10.7734
1	2011	7	8.10166	81	0	-14.3675	0.40452	-36.2635	-25.3155		0	-24.7949	0.088928	-72.9435	-48.8692		0	-5.57265	0.110874	-21.4769	-13.5248
1	2011	8	5.63112	25	0	-14.3675	0.0335672	-36.6345	-25.501		0	-24.7949	0.001568	-73.0309	-48.9129		0	-5.57265	0.000759259	-21.587	-13.5798
1	2011	9	6.45115	-45	0	-14.3675	0.00902261	-36.659	-25.5133		0	-24.7949	0.0244479	-73.008	-48.9014		0	-5.57265	0.00343391	-21.5844	-13.5785
1	2011	10	8.37427	-14	0	-14.3675	0.431393	-36.2367	-25.3021		1	-23.7949	1.3054	-71.727	-47.7609		0	-5.57265	0.109316	-21.4785	-13.5256
1	2011	11	7.11894	-17	9	-5.36752	15.137	-21.531	-13.4493		15	-9.79487	33.9169	-39.1155	-24.4552		3	-2.57265	7.85609	-13.7317	-8.15218
1	2011	12	6.85361	2	19	4.63248	38.1055	1.43744	3.03496		35	10.2051	86.436	13.4036	11.8044		4	-1.57265	17.6042	-3.98359	-2.77812
1	2012	1	6.70453	28	37	22.6325	72.3726	35.7046	29.1685		58	33.2051	152.046	79.0138	56.1094		10	4.42735	36.8562	15.2684	9.84789
1	2012	2	5.81717	76	49	34.6325	102.738	66.0703	50.3514		76	51.2051	212.644	139.611	95.4083		18	12.4274	54.5701	32.9823	22.7048
1	2012	3	9.4136	78	44	29.6325	114.018	77.3496	53.4911		75	50.2051	253.453	180.42	115.313		6	0.42735	48.6076	27.0198	13.7236
1	2012	4	13.1538	136	20	5.63248	75.1678	38.4997	22.0661		33	8.20513	192.474	119.441	63.8233		0	-5.57265	17.2402	-4.34757	-4.96011
-10	2012	5	10.7341	NaN	2	-12.3675	18.4503	-18.2178	-15.2926		2	-22.7949	51.8544	-21.178	-21.9865		0	-5.57265	1.84621	-19.7416	-12.6571
1	2012	6	6.26978	87	0	-14.3675	1.31434	-35.3537	-24.8606		0	-24.7949	3.26782	-69.7646	-47.2797		0	-5.57265	0.0272296	-21.5606	-13.5666
1	2012	7	4.33622	4	0	-14.3675	0.0637793	-36.6043	-25.4859		0	-24.7949	0.00642	-73.026	-48.9104		0	-5.57265	1.85185e-05	-21.5878	-13.5802
1	2012	8	3.86596	-30	0	-14.3675	0.00129267	-36.6668	-25.5171		0	-24.7949	0.00298625	-73.0294	-48.9122		0	-5.57265	0.00055272	-21.5873	-13.58
1	2012	9	4.22519	-56	0	-14.3675	0.00511853	-36.6629	-25.5152		0	-24.7949	0.0133733	-73.019	-48.907		0	-5.57265	0.0014441	-21.5864	-13.5795

## Sheet: Columbia at The Dalles
Year	Month	Label	Q	TWS	Reservoir	Soil	Snow	TWS_f
2003	1	2003-01-01	14.9506	-23	-0.0591946	-11	14.414	-26.3548
2003	2	2003-02-01	14.8765	47	-0.0697476	24.5	35.6874	-13.1177
2003	3	2003-03-01	19.2257	65	-0.0808075	34	51.0629	-19.9821
2003	4	2003-04-01	24.1896	83	-0.0467	43.5	26.1049	13.4418
2003	5	2003-05-01	29.8889	44	-0.0269365	24.5	-18.2103	37.7373
2003	6	2003-06-01	29.2954	NaN	0.0466334	6	-36.1068	NaN
2003	7	2003-07-01	18.1508	-35	0.0569345	-14	-36.6509	15.594
2003	8	2003-08-01	16.2233	-90	0.00532155	-41	-36.6672	-12.3381
2003	9	2003-09-01	11.308	-112	0.00230005	-51.5	-36.6233	-23.879
2003	10	2003-10-01	13.1837	-123	-0.0111301	-56.5	-36.2736	-30.2153
2003	11	2003-11-01	14.8271	-88	-0.0163666	-38.5	-21.9475	-27.5361
2003	12	2003-12-01	17.4959	-35	-0.0272591	-11.5	13.0463	-36.519
2004	1	2004-01-01	17.3847	14	-0.0417752	7.5	51.8621	-45.3203
2004	2	2004-02-01	15.1332	55	-0.0581712	28.5	73.6965	-47.1384
2004	3	2004-03-01	17.6195	62	-0.068872	32.5	60.6143	-31.0454
2004	4	2004-04-01	19.3947	34	-0.0397	19	2.59901	12.4407
2004	5	2004-05-01	27.1582	17	0.0169345	11	-31.6111	37.5942
2004	6	2004-06-01	26.593	-2	0.0609667	2	-36.3408	32.2799
2004	7	2004-07-01	18.1261	-50	0.0637087	-21.5	-36.6627	8.09898
2004	8	2004-08-01	16.0132	-103	0.0095151	-47.5	-36.6669	-18.8427
2004	9	2004-09-01	13.6433	-70	0.00830005	-30.5	-36.6467	-2.86161
2004	10	2004-10-01	13.7521	-72	0.00886994	-31	-35.2881	-5.7208
2004	11	2004-11-01	14.851	-45	0.0159667	-17	-26.0547	-1.96126
2004	12	2004-12-01	19.0528	-25	-0.000484897	-6.5	-2.74604	-15.7535
2005	1	2005-01-01	18.4226	18	0.0169345	9.5	26.3303	-17.8472
2005	2	2005-02-01	16.238	24	0.0259667	13	31.1068	-20.1328
2005	3	2005-03-01	16.3963	18	0.0291925	10.5	18.332	-10.8612
2005	4	2005-04-01	17.362	45	0.0146334	24.5	5.19637	15.289
2005	5	2005-05-01	28.7521	30	0.0382248	17.5	-30.7494	43.2112
2005	6	2005-06-01	23.3407	10	0.0666334	8	-36.531	38.4644
2005	7	2005-07-01	21.734	-44	0.0624183	-18.5	-36.6664	11.104
2005	8	2005-08-01	16.804	-65	0.0079022	-28.5	-36.6654	0.157538
2005	9	2005-09-01	11.3068	-108	0.00596672	-49.5	-36.6491	-21.8569
2005	10	2005-10-01	13.6656	-86	0.00596672	-38	-36.3607	-11.6452
2005	11	2005-11-01	14.7434	-54	0.00596672	-21.5	-21.9941	-10.5118
2005	12	2005-12-01	16.5816	-8	-0.000484897	2	7.14289	-17.1424
2006	1	2006-01-01	22.5001	38	-0.00693651	19.5	44.9551	-26.4482
2006	2	2006-02-01	19.8539	103	-0.00260471	52.5	79.8696	-29.367
2006	3	2006-03-01	20.3131	114	-0.0269365	58.5	85.7571	-30.2301
2006	4	2006-04-01	36.5056	117	-0.0293666	60.5	45.2254	11.3039
2006	5	2006-05-01	42.1583	79	-0.0340333	42	-16.7904	53.8244
2006	6	2006-06-01	37.4861	50	0.0526334	28	-35.9416	57.889
2006	7	2006-07-01	22.3024	-16	0.0591925	-4.5	-36.6248	25.0656
2006	8	2006-08-01	16.8781	-72	0.0108054	-32	-36.6655	-3.34534
2006	9	2006-09-01	11.1071	-98	0.0209667	-44.5	-36.6151	-16.9059
2006	10	2006-10-01	11.9901	-96	0.00467639	-43	-35.9847	-17.02
2006	11	2006-11-01	15.5086	-28	0.00296672	-8.5	-19.7636	0.260673
2006	12	2006-12-01	17.4589	9	-0.00113006	10.5	18.6037	-20.1026
2007	1	2007-01-01	21.1038	57	0.00274091	29	59.0096	-31.0123
2007	2	2007-02-01	16.0818	81	-0.00939043	41.5	73.3276	-33.8182
2007	3	2007-03-01	24.7735	94	-0.0114526	48.5	75.7021	-30.1906
2007	4	2007-04-01	27.3942	94	-0.00903328	49	40.4788	4.53028
2007	5	2007-05-01	32.323	82	0.024999	43.5	-13.0228	51.4978
2007	6	2007-06-01	25.6604	46	0.0643	26	-35.5094	55.4451
2007	7	2007-07-01	21.1409	-37	0.0604828	-15	-36.6192	14.5587
2007	8	2007-08-01	17.5206	-75	0.0095151	-33.5	-36.6659	-4.84363
2007	9	2007-09-01	10.6982	-101	0.00763338	-46	-36.6417	-18.366
2007	10	2007-10-01	11.9753	-105	-0.00758167	-47.5	-36.042	-21.4504
2007	11	2007-11-01	13.6433	-69	-0.0157	-29	-26.7866	-13.1977
2007	12	2007-12-01	15.9885	-11	-0.0185494	0.5	5.87589	-17.3573
2008	1	2008-01-01	18.1508	51	-0.0395172	26	57.1925	-32.153
2008	2	2008-02-01	14.9881	97	-0.0578264	49.5	102.539	-54.9815
2008	3	2008-03-01	17.6566	102	-0.075001	52.5	91.4414	-41.8664
2008	4	2008-04-01	19.2752	104	-0.0480333	54	72.489	-22.4409
2008	5	2008-05-01	38.1673	93	-0.0704849	49	-2.95465	47.0251
2008	6	2008-06-01	43.0702	58	0.0279667	32	-35.5069	61.4789
2008	7	2008-07-01	25.5272	-33	0.0614506	-13	-36.5882	16.5268
2008	8	2008-08-01	16.1862	-69	0.0314506	-30.5	-36.6655	-1.86598
2008	9	2008-09-01	11.1394	-88	-0.000366618	-39.5	-36.6575	-11.8422
2008	10	2008-10-01	11.9049	-80	-0.0172591	-35	-36.0931	-8.88961
2008	11	2008-11-01	14.3727	-53	-0.0237	-21	-31.4045	-0.571819
2008	12	2008-12-01	16.7299	-24	-0.028872	-6	-4.41063	-13.5605
2009	1	2009-01-01	22.1047	44	-0.0330655	22.5	56.262	-34.7289
2009	2	2009-02-01	14.6644	35	-0.0565333	18.5	61.5332	-44.9767
2009	3	2009-03-01	16.9523	82	-0.0675817	42.5	64.5356	-24.968
2009	4	2009-04-01	27.6931	84	-0.0647	44	38.2269	1.83778
2009	5	2009-05-01	34.164	72	-0.038872	38.5	-14.8736	48.4124
2009	6	2009-06-01	34.4012	19	0.0329667	12.5	-36.2116	42.6787
2009	7	2009-07-01	20.3748	-24	0.0608054	-8.5	-36.647	21.0862
2009	8	2009-08-01	14.7406	-58	0.0630635	-25	-36.6668	3.60373
2009	9	2009-09-01	9.84445	-100	0.0466334	-45.5	-36.6606	-17.886
2009	10	2009-10-01	11.2142	-84	0.0288699	-37	-35.3731	-11.6558
2009	11	2009-11-01	14.1096	-56	0.0223	-22.5	-24.3735	-9.14881
2009	12	2009-12-01	16.631	-23	0.00757962	-5.5	-2.56848	-14.9391
2010	1	2010-01-01	14.7653	8	-0.00983974	4.5	25.5066	-21.9967
2010	2	2010-02-01	13.2694	28	-0.0279619	15	39.67	-26.642
2010	3	2010-03-01	13.8509	53	-0.0414526	28	25.2757	-0.234261
2010	4	2010-04-01	16.0108	39	-0.0400333	21.5	4.4087	13.1313
2010	5	2010-05-01	25.3296	46	-0.0133881	25.5	-27.514	48.0274
2010	6	2010-06-01	40.4994	62	0.0449667	34	-35.9662	63.9212
2010	7	2010-07-01	23.2538	2	0.0514506	4.5	-36.5692	34.0178
2010	8	2010-08-01	15.519	-59	0.0404828	-25.5	-36.6655	3.12505
2010	9	2010-09-01	10.526	-70	0.0226334	-30.5	-36.6371	-2.8855
2010	10	2010-10-01	12.8378	-70	0.00532155	-30	-36.2614	-3.74391
2010	11	2010-11-01	15.1021	-49	0.00596672	-19	-25.6988	-4.3072
2010	12	2010-12-01	17.3971	-1	0.00596672	5.5	17.9147	-24.4206
2011	1	2011-01-01	25.2307	NaN	-0.000807478	1	59.1672	NaN
2011	2	2011-02-01	24.0278	91	-0.023319	46.5	84.3346	-39.8112
2011	3	2011-03-01	28.2826	132	-0.0679043	67.5	101.977	-37.4096
2011	4	2011-04-01	36.0393	166	-0.124367	85	88.9855	-7.8611
2011	5	2011-05-01	48.8922	173	-0.135324	89	23.134	61.0013
2011	6	2011-06-01	58.2799	NaN	-0.0473666	6	-30.072	NaN
2011	7	2011-07-01	40.7003	67	0.0498377	37	-36.2635	66.2137
2011	8	2011-08-01	24.5882	13	0.0643538	10.5	-36.6345	39.0701
2011	9	2011-09-01	14.7075	-62	0.0499667	-26.5	-36.659	1.10905
2011	10	2011-10-01	14.8271	-30	0.0362893	-10	-36.2367	16.2004
2011	11	2011-11-01	16.0467	-30	0.0326334	-9.5	-21.531	0.998413
2011	12	2011-12-01	17.4341	23	0.0208054	17.5	1.43744	4.04176
2012	1	2012-01-01	18.3485	52	0.00596672	26.5	35.7046	-10.2106
2012	2	2012-02-01	16.1822	96	-0.0092057	49	66.0703	-19.0611
2012	3	2012-03-01	25.7867	127	-0.0224204	65	77.3496	-15.3272
2012	4	2012-04-01	40.1048	188	-0.0293666	96	38.4997	53.5296
2012	5	2012-05-01	44.2588	NaN	-0.00177522	5	-18.2178	NaN
2012	6	2012-06-01	42.1854	129	0.0539667	67.5	-35.3537	96.7997
2012	7	2012-07-01	40.4408	43	0.0643538	25	-36.6043	54.5399
2012	8	2012-08-01	25.0824	-4	0.0598377	2	-36.6668	30.6069
2012	9	2012-09-01	14.1096	-42	0.0426334	-16.5	-36.6629	11.1203

## Sheet: CRB_no_nan abs
Year	Month	Q	TWS	Reservoir	Soil	Snow	TWS_f	TWS_pos	RES_po	Soil_pos	SWE_pos	GWS	GWSA
2003	10	13.1837	-123	-0.0111301	-56.5	-89.75	23.2611	0	0.124194	0	0	-0.124194
2003	11	14.8271	-88	-0.0163666	-38.5	-63.25	13.7664	35	0.118957	18	26.5	-9.61896
2003	12	17.4959	-35	-0.0272591	-11.5	-23.25	-0.222741	88	0.108065	45	66.5	-23.6081
2004	1	17.3847	14	-0.0417752	7.5	10.75	-4.20822	137	0.0935484	64	100.5	-27.5935
2004	2	15.1332	55	-0.0581712	28.5	41.75	-15.1918	178	0.0771524	85	131.5	-38.5772
2004	3	17.6195	62	-0.068872	32.5	47.25	-17.6811	185	0.0664516	89	137	-41.0665
2004	4	19.3947	34	-0.0397	19	26.5	-11.4603	157	0.0956237	75.5	116.25	-34.8456
2004	5	27.1582	17	0.0169345	11	14	-8.01693	140	0.152258	67.5	103.75	-31.4023
2004	6	26.593	-2	0.0609667	2	0	-4.06097	121	0.19629	58.5	89.75	-27.4463
2004	7	18.1261	-50	0.0637087	-21.5	-35.75	7.18629	73	0.199032	35	54	-16.199
2004	8	16.0132	-103	0.0095151	-47.5	-75.25	19.7405	20	0.144839	9	14.5	-3.64484
2004	9	13.6433	-70	0.00830005	-30.5	-50.25	10.7417	53	0.143624	26	39.5	-12.6436
2004	10	13.7521	-72	0.00886994	-31	-51.5	10.4911	51	0.144194	25.5	38.25	-12.8942
2004	11	14.851	-45	0.0159667	-17	-31	2.98403	78	0.15129	39.5	58.75	-20.4013
2004	12	19.0528	-25	-0.000484897	-6.5	-15.75	-2.74952	98	0.134839	50	74	-26.1348
2005	1	18.4226	18	0.0169345	9.5	13.75	-5.26693	141	0.152258	66	103.5	-28.6523
2005	2	16.238	24	0.0259667	13	18.5	-7.52597	147	0.16129	69.5	108.25	-30.9113
2005	3	16.3963	18	0.0291925	10.5	14.25	-6.77919	141	0.164516	67	104	-30.1645
2005	4	17.362	45	0.0146334	24.5	34.75	-14.2646	168	0.149957	81	124.5	-37.65
2005	5	28.7521	30	0.0382248	17.5	23.75	-11.2882	153	0.173548	74	113.5	-34.6735
2005	6	23.3407	10	0.0666334	8	9	-7.06663	133	0.201957	64.5	98.75	-30.452
2005	7	21.734	-44	0.0624183	-18.5	-31.25	5.68758	79	0.197742	38	58.5	-17.6977
2005	8	16.804	-65	0.0079022	-28.5	-46.75	10.2421	58	0.143226	28	43	-13.1432
2005	9	11.3068	-108	0.00596672	-49.5	-78.75	20.244	15	0.14129	7	11	-3.14129
2005	10	13.6656	-86	0.00596672	-38	-62	13.994	37	0.14129	18.5	27.75	-9.39129
2005	11	14.7434	-54	0.00596672	-21.5	-37.75	5.24403	69	0.14129	35	52	-18.1413
2005	12	16.5816	-8	-0.000484897	2	-3	-6.99952	115	0.134839	58.5	86.75	-30.3848
2006	1	22.5001	38	-0.00693651	19.5	28.75	-10.2431	161	0.128387	76	118.5	-33.6284
2006	2	19.8539	103	-0.00260471	52.5	77.75	-27.2474	226	0.132719	109	167.5	-50.6327
2006	3	20.3131	114	-0.0269365	58.5	86.25	-30.7231	237	0.108387	115	176	-54.1084
2006	4	36.5056	117	-0.0293666	60.5	88.75	-32.2206	240	0.105957	117	178.5	-55.606
2006	5	42.1583	79	-0.0340333	42	60.5	-23.466	202	0.10129	98.5	150.25	-46.8513
2006	6	37.4861	50	0.0526334	28	39	-17.0526	173	0.187957	84.5	128.75	-40.438
2006	7	22.3024	-16	0.0591925	-4.5	-10.25	-1.30919	107	0.194516	52	79.5	-24.6945
2006	8	16.8781	-72	0.0108054	-32	-52	11.9892	51	0.146129	24.5	37.75	-11.3961
2006	9	11.1071	-98	0.0209667	-44.5	-71.25	17.729	25	0.15629	12	18.5	-5.65629
2006	10	11.9901	-96	0.00467639	-43	-69.5	16.4953	27	0.14	13.5	20.25	-6.89
2006	11	15.5086	-28	0.00296672	-8.5	-18.25	-1.25297	95	0.13829	48	71.5	-24.6383
2006	12	17.4589	9	-0.00113006	10.5	9.75	-11.2489	132	0.134194	67	99.5	-34.6342
2007	1	21.1038	57	0.00274091	29	43	-15.0027	180	0.138065	85.5	132.75	-38.3881
2007	2	16.0818	81	-0.00939043	41.5	61.25	-21.7406	204	0.125933	98	151	-45.1259
2007	3	24.7735	94	-0.0114526	48.5	71.25	-25.7385	217	0.123871	105	161	-49.1239
2007	4	27.3942	94	-0.00903328	49	71.5	-26.491	217	0.12629	105.5	161.25	-49.8763
2007	5	32.323	82	0.024999	43.5	62.75	-24.275	205	0.160323	100	152.5	-47.6603
2007	6	25.6604	46	0.0643	26	36	-16.0643	169	0.199624	82.5	125.75	-39.4496
2007	7	21.1409	-37	0.0604828	-15	-26	3.93952	86	0.195806	41.5	63.75	-19.4458
2007	8	17.5206	-75	0.0095151	-33.5	-54.25	12.7405	48	0.144839	23	35.5	-10.6448
2007	9	10.6982	-101	0.00763338	-46	-73.5	18.4924	22	0.142957	10.5	16.25	-4.89296
2007	10	11.9753	-105	-0.00758167	-47.5	-76.25	18.7576	18	0.127742	9	13.5	-4.62774
2007	11	13.6433	-69	-0.0157	-29	-49	9.0157	54	0.119624	27.5	40.75	-14.3696
2007	12	15.9885	-11	-0.0185494	0.5	-5.25	-6.23145	112	0.116774	57	84.5	-29.6168
2008	1	18.1508	51	-0.0395172	26	38.5	-13.4605	174	0.0958065	82.5	128.25	-36.8458
2008	2	14.9881	97	-0.0578264	49.5	73.25	-25.6922	220	0.0774972	106	163	-49.0775
2008	3	17.6566	102	-0.075001	52.5	77.25	-27.675	225	0.0603226	109	167	-51.0603
2008	4	19.2752	104	-0.0480333	54	79	-28.952	227	0.0872903	110.5	168.75	-52.3373
2008	5	38.1673	93	-0.0704849	49	71	-26.9295	216	0.0648387	105.5	160.75	-50.3148
2008	6	43.0702	58	0.0279667	32	45	-19.028	181	0.16329	88.5	134.75	-42.4133
2008	7	25.5272	-33	0.0614506	-13	-23	2.93855	90	0.196774	43.5	66.75	-20.4468
2008	8	16.1862	-69	0.0314506	-30.5	-49.75	11.2185	54	0.166774	26	40	-12.1668
2008	9	11.1394	-88	-0.000366618	-39.5	-63.75	15.2504	35	0.134957	17	26	-8.13496
2008	10	11.9049	-80	-0.0172591	-35	-57.5	12.5173	43	0.118065	21.5	32.25	-10.8681
2008	11	14.3727	-53	-0.0237	-21	-37	5.0237	70	0.111624	35.5	52.75	-18.3616
2008	12	16.7299	-24	-0.028872	-6	-15	-2.97113	99	0.106452	50.5	74.75	-26.3565
2009	1	22.1047	44	-0.0330655	22.5	33.25	-11.7169	167	0.102258	79	123	-35.1023
2009	2	14.6644	35	-0.0565333	18.5	26.75	-10.1935	158	0.0787903	75	116.5	-33.5788
2009	3	16.9523	82	-0.0675817	42.5	62.25	-22.6824	205	0.0677419	99	152	-46.0677
2009	4	27.6931	84	-0.0647	44	64	-23.9353	207	0.0706237	100.5	153.75	-47.3206
2009	5	34.164	72	-0.038872	38.5	55.25	-21.7111	195	0.0964516	95	145	-45.0965
2009	6	34.4012	19	0.0329667	12.5	15.75	-9.28297	142	0.16829	69	105.5	-32.6683
2009	7	20.3748	-24	0.0608054	-8.5	-16.25	0.689195	99	0.196129	48	73.5	-22.6961
2009	8	14.7406	-58	0.0630635	-25	-41.5	8.43694	65	0.198387	31.5	48.25	-14.9484
2009	9	9.84445	-100	0.0466334	-45.5	-72.75	18.2034	23	0.181957	11	17	-5.18196
2009	10	11.2142	-84	0.0288699	-37	-60.5	13.4711	39	0.164194	19.5	29.25	-9.91419
2009	11	14.1096	-56	0.0223	-22.5	-39.25	5.7277	67	0.157624	34	50.5	-17.6576
2009	12	16.631	-23	0.00757962	-5.5	-14.25	-3.25758	100	0.142903	51	75.5	-26.6429
2010	1	14.7653	8	-0.00983974	4.5	6.25	-2.74016	131	0.125484	61	96	-26.1255
2010	2	13.2694	28	-0.0279619	15	21.5	-8.47204	151	0.107362	71.5	111.25	-31.8574
2010	3	13.8509	53	-0.0414526	28	40.5	-15.4585	176	0.093871	84.5	130.25	-38.8439
2010	4	16.0108	39	-0.0400333	21.5	30.25	-12.71	162	0.0952903	78	120	-36.0953
2010	5	25.3296	46	-0.0133881	25.5	35.75	-15.2366	169	0.121935	82	125.5	-38.6219
2010	6	40.4994	62	0.0449667	34	48	-20.045	185	0.18029	90.5	137.75	-43.4303
2010	7	23.2538	2	0.0514506	4.5	3.25	-5.80145	125	0.186774	61	93	-29.1868
2010	8	15.519	-59	0.0404828	-25.5	-42.25	8.70952	64	0.175806	31	47.5	-14.6758
2010	9	10.526	-70	0.0226334	-30.5	-50.25	10.7274	53	0.157957	26	39.5	-12.658
2010	10	12.8378	-70	0.00532155	-30	-50	9.99468	53	0.140645	26.5	39.75	-13.3906
2010	11	15.1021	-49	0.00596672	-19	-34	3.99403	74	0.14129	37.5	55.75	-19.3913
2010	12	17.3971	-1	0.00596672	5.5	2.25	-8.75597	122	0.14129	62	92	-32.1413
2011	1	25.2307	45	-0.000807478	23	34	-11.9992	168	0.134516	79.5	123.75	-35.3845
2011	2	24.0278	91	-0.023319	46.5	68.75	-24.2267	214	0.112005	103	158.5	-47.612
2011	3	28.2826	132	-0.0679043	67.5	99.75	-35.1821	255	0.0674194	124	189.5	-58.5674
2011	4	36.0393	166	-0.124367	85	125.5	-44.3756	289	0.010957	141.5	215.25	-67.761
2011	5	48.8922	173	-0.135324	89	131	-46.8647	296	0	145.5	220.75	-70.25
2011	6	58.2799	120	-0.0473666	63	91.5	-34.4526	243	0.087957	119.5	181.25	-57.838
2011	7	40.7003	67	0.0498377	37	52	-22.0498	190	0.185161	93.5	141.75	-45.4352
2011	8	24.5882	13	0.0643538	10.5	11.75	-9.31435	136	0.199677	67	101.5	-32.6997
2011	9	14.7075	-62	0.0499667	-26.5	-44.25	8.70003	61	0.18529	30	45.5	-14.6853
2011	10	14.8271	-30	0.0362893	-10	-20	-0.0362893	93	0.171613	46.5	69.75	-23.4216
2011	11	16.0467	-30	0.0326334	-9.5	-19.75	-0.782633	93	0.167957	47	70	-24.168
2011	12	17.4341	23	0.0208054	17.5	20.25	-14.7708	146	0.156129	74	110	-38.1561
2012	1	18.3485	52	0.00596672	26.5	39.25	-13.756	175	0.14129	83	129	-37.1413
2012	2	16.1822	96	-0.0092057	49	72.5	-25.4908	219	0.126118	105.5	162.25	-48.8761
2012	3	25.7867	127	-0.0224204	65	96	-33.9776	250	0.112903	121.5	185.75	-57.3629
2012	4	40.1048	188	-0.0293666	96	142	-49.9706	311	0.105957	152.5	231.75	-73.356
2012	5	44.2588	158.5	-0.00177522	81.75	120.125	-43.3732	281.5	0.133548	138.25	209.875	-66.7585
2012	6	42.1854	129	0.0539667	67.5	98.25	-36.804	252	0.18929	124	188	-60.1893
2012	7	40.4408	43	0.0643538	25	34	-16.0644	166	0.199677	81.5	123.75	-39.4497
2012	8	25.0824	-4	0.0598377	2	-1	-5.05984	119	0.195161	58.5	88.75	-28.4452
2012	9	14.1096	-42	0.0426334	-16.5	-29.25	3.70737	81	0.177957	40	60.5	-19.678
Coeffiecinet of variati0on		0.453222	6.64283	25.8898	4.05676	5.49842	-2.18765	129.643	26.0251	60.5568	95.2484	-52.1875
		9.69358	73.717	0.0412791	35.6938	54.6979	16.7375	196.717	0.176603	92.1938	144.448	-40.1014

## Sheet: The Dalles
Date	DAL.R	DAL.TWS	DAL.GWSA	DAL.sub	DAL.SM	DAL.SWE	DAL.res
2003-10-01	13.1837	-123	-4.48643	-69.7404	-65.254	-53.1877	-0.0718803
2003-11-01	14.8271	-88	-3.62698	-46.4003	-42.7733	-41.5246	-0.075048
2003-12-01	17.4959	-35	-2.89735	-29.9304	-27.033	-5.02773	-0.0419093
2004-01-01	17.3847	14	-6.50252	-28.2253	-21.7227	42.3802	-0.154909
2004-02-01	15.1332	55	-0.779269	-12.0554	-11.2761	67.2974	-0.241989
2004-03-01	17.6195	62	-9.50746	2.01814	11.5256	60.2563	-0.274425
2004-04-01	19.3947	34	-13.7037	24.8275	38.5312	9.24863	-0.0760814
2004-05-01	27.1582	17	5.93362	46.7976	40.864	-29.8564	0.0588004
2004-06-01	26.593	-2	10.4224	43.4724	33.05	-45.7213	0.248885
2004-07-01	18.1261	-50	8.86737	2.17277	-6.69459	-52.3822	0.209446
2004-08-01	16.0132	-103	-4.75283	-50.0722	-45.3194	-52.8843	-0.0434577
2004-09-01	13.6433	-70	10.9839	-16.5306	-27.5145	-53.3742	-0.095138
2004-10-01	13.7521	-72	7.9062	-20.2541	-28.1603	-51.6949	-0.0509416
2004-11-01	14.851	-45	14.8694	-0.425454	-15.2948	-44.5782	0.00368531
2004-12-01	19.0528	-25	-1.13631	-3.63084	-2.49453	-21.4239	0.0547358
2005-01-01	18.4226	18	4.75063	12.2934	7.54276	5.61426	0.0923487
2005-02-01	16.238	24	-10.3176	13.3712	23.6887	10.5025	0.126323
2005-03-01	16.3963	18	-21.2113	14.3835	35.5948	3.61514	0.00138101
2005-04-01	17.362	45	-5.41167	48.0094	53.4211	-2.95269	-0.056748
2005-05-01	28.7521	30	8.43365	68.3877	59.9541	-38.4256	0.0378326
2005-06-01	23.3407	10	-12.6095	61.0111	73.6206	-51.3164	0.305252
2005-07-01	21.734	-44	-31.8262	9.09658	40.9228	-53.3841	0.28751
2005-08-01	16.804	-65	9.19858	-11.6354	-20.8339	-53.3836	0.0189617
2005-09-01	11.3068	-108	-25.0473	-54.537	-29.4897	-53.3754	-0.0875814
2005-10-01	13.6656	-86	-28.5288	-33.227	-4.69824	-52.7312	-0.041748
2005-11-01	14.7434	-54	-25.5008	-18.9304	6.57044	-35.0479	-0.0216814
2005-12-01	16.5816	-8	-9.62842	-4.48111	5.14731	-3.47943	-0.0394577
2006-01-01	22.5001	38	-39.0105	-7.99773	31.0127	45.9267	0.0710584
2006-02-01	19.8539	103	-23.5953	14.1912	37.7865	88.8839	-0.0751052
2006-03-01	20.3131	114	-42.4203	10.399	52.8194	103.828	-0.226684
2006-04-01	36.5056	117	-45.9515	41.2212	87.1727	76.0618	-0.283015
2006-05-01	42.1583	79	-6.25502	77.6828	83.9378	1.55392	-0.236684
2006-06-01	37.4861	50	23.5347	95.7371	72.2024	-46.0217	0.284585
2006-07-01	22.3024	-16	26.5541	36.5767	10.0226	-52.8633	0.286542
2006-08-01	16.8781	-72	28.8773	-18.6438	-47.5211	-53.3836	0.027381
2006-09-01	11.1071	-98	25.1455	-44.5902	-69.7357	-53.3584	-0.0513814
2006-10-01	11.9901	-96	21.9209	-43.9283	-65.8492	-52.0432	-0.02849
2006-11-01	15.5086	-28	36.517	11.8992	-24.6178	-39.9327	0.0334853
2006-12-01	17.4589	9	20.6516	5.18604	-15.4655	3.75097	0.0629939
2007-01-01	21.1038	57	5.35539	-3.53239	-8.88778	60.4539	0.0784778
2007-02-01	16.0818	81	-19.8256	-21.0992	-1.27366	102.113	-0.0136766
2007-03-01	24.7735	94	-36.9538	-12.3696	24.5842	106.3	0.0694455
2007-04-01	27.3942	94	-46.7401	4.86958	51.6096	89.1885	-0.0580814
2007-05-01	32.323	82	3.29369	55.5958	52.3021	26.4377	-0.0334577
2007-06-01	25.6604	46	42.9618	75.5683	32.6065	-29.8056	0.237252
2007-07-01	21.1409	-37	36.8963	13.6529	-23.2433	-50.8605	0.207542
2007-08-01	17.5206	-75	51.2041	-21.5856	-72.7897	-53.3838	-0.0305932
2007-09-01	10.6982	-101	41.4936	-47.5101	-89.0038	-53.3717	-0.118154
2007-10-01	11.9753	-105	6.36705	-52.8595	-59.2266	-52.0719	-0.0685867
2007-11-01	13.6433	-69	20.3008	-25.497	-45.7977	-43.4442	-0.058848
2007-12-01	15.9885	-11	23.8629	-8.36239	-32.2252	-2.61293	-0.0246835
2008-01-01	18.1508	51	18.6426	-8.47407	-27.1167	59.5454	-0.0712964
2008-02-01	14.9881	97	-1.39805	-19.5099	-18.1119	116.719	-0.208886
2008-03-01	17.6566	102	-21.2239	-12.357	8.86693	114.67	-0.312813
2008-04-01	19.2752	104	-29.854	-0.256859	29.5971	104.694	-0.436748
2008-05-01	38.1673	93	10.8426	63.4965	52.6539	29.9718	-0.468296
2008-06-01	43.0702	58	44.1309	88.6227	44.4919	-30.8043	0.181585
2008-07-01	25.5272	-33	25.1706	17.5604	-7.61012	-50.845	0.284542
2008-08-01	16.1862	-69	33.1252	-15.6784	-48.8036	-53.3836	0.0619939
2008-09-01	11.1394	-88	23.017	-34.5306	-57.5476	-53.3796	-0.0897814
2008-10-01	11.9049	-80	26.2172	-27.3526	-53.5698	-52.5974	-0.0499738
2008-11-01	14.3727	-53	28.4761	-5.7298	-34.2059	-47.2531	-0.0170814
2008-12-01	16.7299	-24	22.7289	-6.21938	-28.9483	-17.7562	-0.0244254
2009-01-01	22.1047	44	7.82516	-9.1289	-16.9541	53.0801	0.0488004
2009-02-01	14.6644	35	-23.974	-31.2067	-7.23272	66.2157	-0.00903374
2009-03-01	16.9523	82	-13.1909	-0.770868	12.42	82.7169	0.0539617
2009-04-01	27.6931	84	-29.1719	11.4815	40.6534	72.5626	-0.0440814
2009-05-01	34.164	72	0.752237	53.5921	52.8399	18.5123	-0.104425
2009-06-01	34.4012	19	28.4043	54.8541	26.4498	-36.1567	0.302585
2009-07-01	20.3748	-24	19.1731	27.0266	7.85347	-51.3744	0.347833
2009-08-01	14.7406	-58	26.5567	-4.75905	-31.3158	-53.3843	0.143316
2009-09-01	9.84445	-100	17.0909	-46.6109	-63.7017	-53.3812	-0.00791469
2009-10-01	11.2142	-84	29.6445	-33.8006	-63.4451	-50.2374	0.0379939
2009-11-01	14.1096	-56	14.3853	-21.319	-35.7043	-34.7376	0.0565853
2009-12-01	16.631	-23	10.8374	-18.6914	-29.5288	-4.33512	0.0265423
2010-01-01	14.7653	8	-7.83693	-24.7696	-16.9327	32.7024	0.0671875
2010-02-01	13.2694	28	-19.4824	-25.834	-6.35161	53.7841	0.0498948
2010-03-01	13.8509	53	-5.1002	7.91067	13.0109	45.087	0.00234875
2010-04-01	16.0108	39	-25.4299	3.84861	29.2785	35.1535	-0.00208136
2010-05-01	25.3296	46	4.07283	43.3233	39.2505	2.6921	-0.0153932
2010-06-01	40.4994	62	42.5945	90.7134	48.1189	-29.034	0.320585
2010-07-01	23.2538	2	42.2649	50.5112	8.24635	-48.8355	0.324284
2010-08-01	15.519	-59	33.1238	-6.2267	-39.3505	-52.8836	0.110349
2010-09-01	10.526	-70	30.2606	-16.5856	-46.8462	-53.3694	-0.0449814
2010-10-01	12.8378	-70	25.3492	-17.8141	-43.1633	-52.1816	-0.00429641
2010-11-01	15.1021	-49	15.8306	-12.1015	-27.9322	-36.9003	0.00178531
2010-12-01	17.3971	-1	2.64066	-17.4182	-20.0588	16.4065	0.0117036
2011-01-01	25.2307	45	-11.8644	-18.5976	-6.73321	63.5327	0.0649294
2011-02-01	24.0278	91	-9.42449	-2.02951	7.39498	93.1164	-0.0868909
2011-03-01	28.2826	132	-22.7358	4.91076	27.6465	127.438	-0.348619
2011-04-01	36.0393	166	-34.343	31.6459	65.9889	134.942	-0.587748
2011-05-01	48.8922	173	-2.72235	88.6135	91.3358	85.0161	-0.629587
2011-06-01	58.2799	120	21.7091	109.725	88.0162	10.4131	-0.138415
2011-07-01	40.7003	67	67.8262	104.299	36.4728	-37.6826	0.383639
2011-08-01	24.5882	13	83.7619	63.0832	-20.6787	-50.3681	0.284929
2011-09-01	14.7075	-62	51.657	-9.1882	-60.8452	-52.8804	0.0685853
2011-10-01	14.8271	-30	72.2149	22.1226	-50.0923	-52.1692	0.0466068
2011-11-01	16.0467	-30	41.6014	2.75191	-38.8495	-32.8164	0.0644853
2011-12-01	17.4341	23	57.0226	27.8298	-29.1928	-4.83216	0.00234875
2012-01-01	18.3485	52	36.5542	15.6872	-20.867	36.3014	0.011381
2012-02-01	16.1822	96	29.2589	18.5122	-10.7466	77.4843	0.00352784
2012-03-01	25.7867	127	9.58447	20.9466	11.3621	106.124	-0.0705545
2012-04-01	40.1048	188	49.5477	102.13	52.582	86.199	-0.328748
2012-05-01	44.2588	158.5	74.198	136.89	62.692	21.8402	-0.230232
2012-06-01	42.1854	129	88.7598	152.566	63.8064	-23.7277	0.161585
2012-07-01	40.4408	43	65.8063	90.6043	24.798	-47.853	0.248736
2012-08-01	25.0824	-4	85.2496	48.8228	-36.4268	-52.8843	0.0614455
2012-09-01	14.1096	-42	84.5057	11.4288	-73.0768	-53.3823	-0.0464814

## Sheet: Upper Columbia
Year	Month	Label	Q	TWS	Reservoir	Soil	Snow	TWS_f
2003	1	2003-01-01	35.7126	-1	-0.0591946	-6.59259	23.5016	-17.8498
2003	2	2003-02-01	23.5968	51	-0.0697476	8.92124	70.6521	-28.5036
2003	3	2003-03-01	30.6308	85	-0.0808075	24.1919	109.32	-48.4312
2003	4	2003-04-01	36.3684	110	-0.0467	50.8559	68.1742	-8.98343
2003	5	2003-05-01	46.8246	76	-0.0269365	65.5658	-29.4232	39.8843
2003	6	2003-06-01	64.4	NaN	0.0466334	49.1805	-71.9565	NaN
2003	7	2003-07-01	51.1078	-14	0.0569345	1.74784	-73.027	57.2222
2003	8	2003-08-01	47.8362	-88	0.00532155	-55.6139	-73.0306	40.6391
2003	9	2003-09-01	37.3614	-117	0.00230005	-74.437	-72.8966	30.3313
2003	10	2003-10-01	38.9358	-123	-0.0111301	-65.254	-71.9016	14.1668
2003	11	2003-11-01	40.5134	-74	-0.0163666	-42.7733	-42.843	11.6327
2003	12	2003-12-01	49.3655	-23	-0.0272591	-27.033	26.5568	-22.4965
2004	1	2004-01-01	36.3611	9	-0.0417752	-21.7227	72.9414	-42.1769
2004	2	2004-02-01	25.9573	62	-0.0581712	-11.2761	121.289	-47.9545
2004	3	2004-03-01	30.534	66	-0.068872	11.5256	123.311	-68.7674
2004	4	2004-04-01	33.7643	36	-0.0397	38.5312	22.4986	-24.9901
2004	5	2004-05-01	48.7363	24	0.0169345	40.864	-60.4876	43.6066
2004	6	2004-06-01	58.967	-11	0.0609667	33.05	-72.7184	28.6075
2004	7	2004-07-01	48.354	-56	0.0637087	-6.69459	-73.0288	23.6596
2004	8	2004-08-01	44.2257	-117	0.0095151	-45.3194	-73.0313	1.3412
2004	9	2004-09-01	42.4946	-66	0.00830005	-27.5145	-72.9943	34.5005
2004	10	2004-10-01	37.1451	-83	0.00886994	-28.1603	-69.3434	14.4949
2004	11	2004-11-01	39.2957	-42	0.0159667	-15.2948	-43.9497	17.2286
2004	12	2004-12-01	51.3982	-12	-0.000484897	-2.49453	3.46264	-12.9676
2005	1	2005-01-01	44.7145	29	0.0169345	7.54276	49.1519	-27.7115
2005	2	2005-02-01	31.9636	45	0.0259667	23.6887	69.8491	-48.5638
2005	3	2005-03-01	29.1499	37	0.0291925	35.5948	53.8072	-52.4312
2005	4	2005-04-01	31.0057	60	0.0146334	53.4211	29.6811	-23.1169
2005	5	2005-05-01	54.3989	14	0.0382248	59.9541	-58.6704	12.6781
2005	6	2005-06-01	68.8963	5	0.0666334	73.6206	-72.9557	4.26851
2005	7	2005-07-01	64.4656	-46	0.0624183	40.9228	-73.0292	-13.956
2005	8	2005-08-01	50.6239	-73	0.0079022	-20.8339	-73.028	20.854
2005	9	2005-09-01	38.6915	-107	0.00596672	-29.4897	-72.9896	-4.52668
2005	10	2005-10-01	40.1022	-81	0.00596672	-4.69824	-72.1342	-4.17348
2005	11	2005-11-01	36.3263	-44	0.00596672	6.57044	-42.9679	-7.60854
2005	12	2005-12-01	48.5428	-16	-0.000484897	5.14731	-1.89231	-19.2545
2006	1	2006-01-01	34.5075	19	-0.00693651	31.0127	63.7389	-75.7447
2006	2	2006-02-01	27.3387	93	-0.00260471	37.7865	128.505	-73.2892
2006	3	2006-03-01	35.7803	113	-0.0269365	52.8194	154.793	-94.585
2006	4	2006-04-01	42.2511	113	-0.0293666	87.1727	82.0726	-56.2159
2006	5	2006-05-01	75.7906	74	-0.0340333	83.9378	-35.8093	25.9055
2006	6	2006-06-01	83.1345	45	0.0526334	72.2024	-72.6371	45.382
2006	7	2006-07-01	61.6101	-35	0.0591925	10.0226	-73.0316	27.9498
2006	8	2006-08-01	49.3171	-101	0.0108054	-47.5211	-73.0283	19.5386
2006	9	2006-09-01	37.8672	-125	0.0209667	-69.7357	-72.9139	17.6286
2006	10	2006-10-01	31.894	-130	0.00467639	-65.8492	-71.4201	7.2646
2006	11	2006-11-01	31.7785	-44	0.00296672	-24.6178	-34.7829	15.3977
2006	12	2006-12-01	41.8978	19	-0.00113006	-15.4655	41.2872	-6.82056
2007	1	2007-01-01	44.6032	77	0.00274091	-8.88778	117.885	-31.9998
2007	2	2007-02-01	38.5907	105	-0.00939043	-1.27366	161.307	-55.0244
2007	3	2007-03-01	38.81	130	-0.0114526	24.5842	179.951	-74.5234
2007	4	2007-04-01	48.8503	140	-0.00903328	51.6096	121.196	-32.7969
2007	5	2007-05-01	71.58	129	0.024999	52.3021	-9.69527	86.3682
2007	6	2007-06-01	72.7369	82	0.0643	32.6065	-70.4257	119.755
2007	7	2007-07-01	65.1915	-14	0.0604828	-23.2433	-73.0323	82.2152
2007	8	2007-08-01	51.7854	-75	0.0095151	-72.7897	-73.0283	70.8084
2007	9	2007-09-01	35.9188	-102	0.00763338	-89.0038	-72.9735	59.9696
2007	10	2007-10-01	30.8631	-112	-0.00758167	-59.2266	-71.6456	18.8797
2007	11	2007-11-01	32.6684	-75	-0.0157	-45.7977	-51.9084	22.7218
2007	12	2007-12-01	42.9674	-9	-0.0185494	-32.2252	7.04635	16.1974
2008	1	2008-01-01	39.7634	52	-0.0395172	-27.1167	80.7471	-1.59087
2008	2	2008-02-01	27.5004	102	-0.0578264	-18.1119	154.187	-34.017
2008	3	2008-03-01	29.8323	113	-0.075001	8.86693	162.193	-57.985
2008	4	2008-04-01	26.6171	122	-0.0480333	29.5971	139.269	-46.8185
2008	5	2008-05-01	68.4342	120	-0.0704849	52.6539	-3.0985	70.5151
2008	6	2008-06-01	89.8321	74	0.0279667	44.4919	-72.2493	101.729
2008	7	2008-07-01	63.9332	-34	0.0614506	-7.61012	-73.0309	46.5796
2008	8	2008-08-01	40.1264	-81	0.0314506	-48.8036	-73.0262	40.7983
2008	9	2008-09-01	32.7011	-98	-0.000366618	-57.5476	-73.0079	32.5559
2008	10	2008-10-01	32.9878	-91	-0.0172591	-53.5698	-71.9272	34.5142
2008	11	2008-11-01	28.528	-63	-0.0237	-34.2059	-60.7244	31.954
2008	12	2008-12-01	45.0194	-29	-0.028872	-28.9483	-15.5226	15.4998
2009	1	2009-01-01	44.7	52	-0.0330655	-16.9541	76.1828	-7.19563
2009	2	2009-02-01	33.7078	38	-0.0565333	-7.23272	107.214	-61.9245
2009	3	2009-03-01	29.0821	81	-0.0675817	12.42	129.706	-61.0582
2009	4	2009-04-01	28.8793	87	-0.0647	40.6534	82.7845	-36.3733
2009	5	2009-05-01	51.6402	75	-0.038872	52.8399	-24.2272	46.4262
2009	6	2009-06-01	65.7582	0	0.0329667	26.4498	-72.5149	46.0321
2009	7	2009-07-01	51.5918	-36	0.0608054	7.85347	-73.031	29.1167
2009	8	2009-08-01	33.4185	-88	0.0630635	-31.3158	-73.0307	16.2834
2009	9	2009-09-01	31.1274	-136	0.0466334	-63.7017	-73.0186	0.673654
2009	10	2009-10-01	30.8051	-117	0.0288699	-63.4451	-69.7825	16.1987
2009	11	2009-11-01	32.5138	-68	0.0223	-35.7043	-42.0821	9.76407
2009	12	2009-12-01	44.7629	-23	0.00757962	-29.5288	4.57833	1.94292
2010	1	2010-01-01	32.8377	21	-0.00983974	-16.9327	51.7209	-13.7784
2010	2	2010-02-01	24.3967	26	-0.0279619	-6.35161	75.6565	-43.277
2010	3	2010-03-01	27.2285	48	-0.0414526	13.0109	57.0268	-21.9962
2010	4	2010-04-01	22.8374	47	-0.0400333	29.2785	18.5512	-0.789662
2010	5	2010-05-01	40.5378	50	-0.0133881	39.2505	-54.2951	65.058
2010	6	2010-06-01	73.3926	70	0.0449667	48.1189	-72.8189	94.6551
2010	7	2010-07-01	55.512	-5	0.0514506	8.24635	-73.0296	59.7318
2010	8	2010-08-01	35.1221	-66	0.0404828	-39.3505	-73.0267	46.3367
2010	9	2010-09-01	31.8815	-77	0.0226334	-46.8462	-72.9363	42.7598
2010	10	2010-10-01	33.8299	-75	0.00532155	-43.1633	-72.268	40.426
2010	11	2010-11-01	31.1509	-62	0.00596672	-27.9322	-53.5844	19.5106
2010	12	2010-12-01	41.3702	-17	0.00596672	-20.0588	11.3824	-8.32958
2011	1	2011-01-01	46.6504	NaN	-0.000807478	-6.73321	86.4275	NaN
2011	2	2011-02-01	42.6867	108	-0.023319	7.39498	156.936	-56.3082
2011	3	2011-03-01	45.2808	157	-0.0679043	27.6465	202.154	-72.733
2011	4	2011-04-01	42.3682	202	-0.124367	65.9889	189.666	-53.5307
2011	5	2011-05-01	76.4682	199	-0.135324	91.3358	51.0766	56.7229
2011	6	2011-06-01	116.857	NaN	-0.0473666	88.0162	-64.6231	NaN
2011	7	2011-07-01	97.1339	74	0.0498377	36.4728	-72.9435	110.421
2011	8	2011-08-01	58.5611	18	0.0643538	-20.6787	-73.0309	111.645
2011	9	2011-09-01	36.3918	-79	0.0499667	-60.8452	-73.008	54.8032
2011	10	2011-10-01	39.0956	-46	0.0362893	-50.0923	-71.727	75.783
2011	11	2011-11-01	38.7711	-48	0.0326334	-38.8495	-39.1155	29.9323
2011	12	2011-12-01	44.4144	44	0.0208054	-29.1928	13.4036	59.7684
2012	1	2012-01-01	44.487	77	0.00596672	-20.867	79.0138	18.8472
2012	2	2012-02-01	32.5188	111	-0.0092057	-10.7466	139.611	-17.8556
2012	3	2012-03-01	40.7217	170	-0.0224204	11.3621	180.42	-21.7598
2012	4	2012-04-01	52.4099	230	-0.0293666	52.582	119.441	58.006
2012	5	2012-05-01	83.9698	NaN	-0.00177522	62.692	-21.178	NaN
2012	6	2012-06-01	106.881	181	0.0539667	63.8064	-69.7646	186.904
2012	7	2012-07-01	115.912	72	0.0643538	24.798	-73.026	120.164
2012	8	2012-08-01	70.0313	6	0.0598377	-36.4268	-73.0294	115.396
2012	9	2012-09-01	41.5813	-47	0.0426334	-73.0768	-73.019	99.0532

## Sheet: UpperColumbia
Date	UPC.R	UPC.TWS	UPC.GWSA	UPC.sub	UPC.SM	UPC.SWE	UPC.res
2003-10-01	38.9358	-123	32.6497	-32.6043	-65.254	-90.3845	-0.0111301
2003-11-01	40.5134	-74	38.1449	-4.62843	-42.7733	-69.3552	-0.0163666
2003-12-01	49.3655	-23	7.71561	-19.3174	-27.033	-3.65534	-0.0272591
2004-01-01	36.3611	9	-23.2725	-44.9952	-21.7227	54.037	-0.0417752
2004-02-01	25.9573	62	-21.3764	-32.6525	-11.2761	94.7107	-0.0581712
2004-03-01	30.534	66	-41.1784	-29.6528	11.5256	95.7216	-0.068872
2004-04-01	33.7643	36	-23.8071	14.7241	38.5312	21.3156	-0.0397
2004-05-01	48.7363	24	32.7966	73.6606	40.864	-49.6775	0.0169345
2004-06-01	58.967	-11	33.682	66.732	33.05	-77.7929	0.0609667
2004-07-01	48.354	-56	41.079	34.3844	-6.69459	-90.4481	0.0637087
2004-08-01	44.2257	-117	19.7593	-25.5601	-45.3194	-91.4494	0.0095151
2004-09-01	42.4946	-66	52.9371	25.4226	-27.5145	-91.4309	0.00830005
2004-10-01	37.1451	-83	33.2569	5.09655	-28.1603	-88.1054	0.00886994
2004-11-01	39.2957	-42	44.1874	28.8926	-15.2948	-70.9086	0.0159667
2004-12-01	51.3982	-12	21.6974	19.2029	-2.49453	-31.2024	-0.000484897
2005-01-01	44.7145	29	15.2981	22.8409	7.54276	6.14219	0.0169345
2005-02-01	31.9636	45	2.29447	25.9832	23.6887	18.9908	0.0259667
2005-03-01	29.1499	37	-9.59384	26.0009	35.5948	10.9699	0.0291925
2005-04-01	31.0057	60	4.15742	57.5785	53.4211	2.40683	0.0146334
2005-05-01	54.3989	14	19.7766	79.7307	59.9541	-65.7689	0.0382248
2005-06-01	68.8963	5	18.7244	92.345	73.6206	-87.4116	0.0666334
2005-07-01	64.4656	-46	4.46314	45.3859	40.9228	-91.4483	0.0624183
2005-08-01	50.6239	-73	39.2738	18.4398	-20.8339	-91.4477	0.0079022
2005-09-01	38.6915	-107	13.9123	-15.5774	-29.4897	-91.4285	0.00596672
2005-10-01	40.1022	-81	13.1931	8.49489	-4.69824	-89.5009	0.00596672
2005-11-01	36.3263	-44	8.34126	14.9117	6.57044	-58.9177	0.00596672
2005-12-01	48.5428	-16	0.23306	5.38037	5.14731	-21.3799	-0.000484897
2006-01-01	34.5075	19	-62.9415	-31.9288	31.0127	50.9357	-0.00693651
2006-02-01	27.3387	93	-63.1028	-25.3163	37.7865	118.319	-0.00260471
2006-03-01	35.7803	113	-93.255	-40.4356	52.8194	153.463	-0.0269365
2006-04-01	42.2511	113	-91.2459	-4.07319	87.1727	117.103	-0.0293666
2006-05-01	75.7906	74	-13.5654	70.3724	83.9378	3.66162	-0.0340333
2006-06-01	83.1345	45	52.9972	125.2	72.2024	-80.2523	0.0526334
2006-07-01	61.6101	-35	46.3677	56.3903	10.0226	-91.4495	0.0591925
2006-08-01	49.3171	-101	37.9582	-9.56291	-47.5211	-91.4479	0.0108054
2006-09-01	37.8672	-125	35.6054	-34.1303	-69.7357	-90.8907	0.0209667
2006-10-01	31.894	-130	23.9883	-41.8609	-65.8492	-88.1438	0.00467639
2006-11-01	31.7785	-44	43.44	18.8222	-24.6178	-62.8252	0.00296672
2006-12-01	41.8978	19	26.2568	10.7912	-15.4655	8.20988	-0.00113006
2007-01-01	44.6032	77	1.87633	-7.01146	-8.88778	84.0087	0.00274091
2007-02-01	38.5907	105	-39.9369	-41.2106	-1.27366	146.22	-0.00939043
2007-03-01	38.81	130	-68.6144	-44.0302	24.5842	174.042	-0.0114526
2007-04-01	48.8503	140	-65.765	-14.1554	51.6096	154.164	-0.00903328
2007-05-01	71.58	129	24.4543	76.7564	52.3021	52.2186	0.024999
2007-06-01	72.7369	82	95.9758	128.582	32.6065	-46.6466	0.0643
2007-07-01	65.1915	-14	94.6327	71.3894	-23.2433	-85.4499	0.0604828
2007-08-01	51.7854	-75	88.728	15.9383	-72.7897	-90.9479	0.0095151
2007-09-01	35.9188	-102	78.4166	-10.5872	-89.0038	-91.4205	0.00763338
2007-10-01	30.8631	-112	35.4907	-23.7359	-59.2266	-88.2565	-0.00758167
2007-11-01	32.6684	-75	42.2013	-3.59639	-45.7977	-71.3879	-0.0157
2007-12-01	42.9674	-9	32.1543	-0.0708974	-32.2252	-8.91055	-0.0185494
2008-01-01	39.7634	52	13.7164	-13.4003	-27.1167	65.4398	-0.0395172
2008-02-01	27.5004	102	-22.99	-41.1018	-18.1119	143.16	-0.0578264
2008-03-01	29.8323	113	-61.4548	-52.5878	8.86693	165.663	-0.075001
2008-04-01	26.6171	122	-70.2501	-40.6529	29.5971	162.701	-0.0480333
2008-05-01	68.4342	120	14.3995	67.0535	52.6539	53.017	-0.0704849
2008-06-01	89.8321	74	79.0385	123.53	44.4919	-49.5584	0.0279667
2008-07-01	63.9332	-34	59.4979	51.8877	-7.61012	-85.9492	0.0614506
2008-08-01	40.1264	-81	58.719	9.91538	-48.8036	-90.9468	0.0314506
2008-09-01	32.7011	-98	50.9857	-6.56196	-57.5476	-91.4377	-0.000366618
2008-10-01	32.9878	-91	51.9843	-1.58542	-53.5698	-89.3973	-0.0172591
2008-11-01	28.528	-63	49.5255	15.3196	-34.2059	-78.2959	-0.0237
2008-12-01	45.0194	-29	36.6722	7.7239	-28.9483	-36.695	-0.028872
2009-01-01	44.7	52	12.3295	-4.62459	-16.9541	56.6577	-0.0330655
2009-02-01	33.7078	38	-44.3839	-51.6166	-7.23272	89.6731	-0.0565333
2009-03-01	29.0821	81	-64.2716	-51.8516	12.42	132.919	-0.0675817
2009-04-01	28.8793	87	-77.5473	-36.8938	40.6534	123.959	-0.0647
2009-05-01	51.6402	75	-25.2536	27.5862	52.8399	47.4527	-0.038872
2009-06-01	65.7582	0	22.7084	49.1582	26.4498	-49.1912	0.0329667
2009-07-01	51.5918	-36	41.035	48.8884	7.85347	-84.9492	0.0608054
2009-08-01	33.4185	-88	34.7018	3.38603	-31.3158	-91.4491	0.0630635
2009-09-01	31.1274	-136	19.0981	-44.6036	-63.7017	-91.443	0.0466334
2009-10-01	30.8051	-117	32.2412	-31.2039	-63.4451	-85.825	0.0288699
2009-11-01	32.5138	-68	15.6567	-20.0475	-35.7043	-47.9748	0.0223
2009-12-01	44.7629	-23	-3.33419	-32.863	-29.5288	9.85543	0.00757962
2010-01-01	32.8377	21	-24.9842	-41.9169	-16.9327	62.9267	-0.00983974
2010-02-01	24.3967	26	-60.015	-66.3666	-6.35161	92.3945	-0.0279619
2010-03-01	27.2285	48	-53.0491	-40.0382	13.0109	88.0797	-0.0414526
2010-04-01	22.8374	47	-61.0804	-31.8018	29.2785	78.8419	-0.0400333
2010-05-01	40.5378	50	-14.1558	25.0947	39.2505	24.9187	-0.0133881
2010-06-01	73.3926	70	55.1793	103.298	48.1189	-33.3432	0.0449667
2010-07-01	55.512	-5	65.6507	73.8971	8.24635	-78.9485	0.0514506
2010-08-01	35.1221	-66	63.7571	24.4066	-39.3505	-90.4471	0.0404828
2010-09-01	31.8815	-77	60.7254	13.8792	-46.8462	-90.9019	0.0226334
2010-10-01	33.8299	-75	58.2257	15.0624	-43.1633	-90.0677	0.00532155
2010-11-01	31.1509	-62	31.6521	3.71995	-27.9322	-65.7259	0.00596672
2010-12-01	41.3702	-17	-2.20463	-22.2634	-20.0588	5.25748	0.00596672
2011-01-01	46.6504	45.5	-32.546	-39.2792	-6.73321	84.78	-0.000807478
2011-02-01	42.6867	108	-62.9062	-55.5112	7.39498	163.535	-0.023319
2011-03-01	45.2808	157	-96.7221	-69.0756	27.6465	226.143	-0.0679043
2011-04-01	42.3682	202	-114.764	-48.775	65.9889	250.899	-0.124367
2011-05-01	76.4682	199	-57.3051	34.0307	91.3358	165.105	-0.135324
2011-06-01	116.857	136.5	12.7764	100.793	88.0162	35.7547	-0.0473666
2011-07-01	97.1339	74	89.3829	125.856	36.4728	-51.9055	0.0498377
2011-08-01	58.5611	18	122.064	101.385	-20.6787	-83.4492	0.0643538
2011-09-01	36.3918	-79	71.233	10.3878	-60.8452	-89.4377	0.0499667
2011-10-01	39.0956	-46	92.8533	42.761	-50.0923	-88.7972	0.0362893
2011-11-01	38.7711	-48	40.3083	1.45884	-38.8495	-49.4915	0.0326334
2011-12-01	44.4144	44	63.4039	34.2111	-29.1928	9.76806	0.0208054
2012-01-01	44.487	77	19.2878	-1.57911	-20.867	78.5731	0.00596672
2012-02-01	32.5188	111	-24.6161	-35.3628	-10.7466	146.372	-0.0092057
2012-03-01	40.7217	170	-52.616	-41.2539	11.3621	211.276	-0.0224204
2012-04-01	52.4099	230	-16.3396	36.2424	52.582	193.787	-0.0293666
2012-05-01	83.9698	205.5	70.8325	133.525	62.692	71.9773	-0.00177522
2012-06-01	106.881	181	139.956	203.762	63.8064	-22.816	0.0539667
2012-07-01	115.912	72	125.584	150.382	24.798	-78.4467	0.0643538
2012-08-01	70.0313	6	132.315	95.8886	-36.4268	-89.9484	0.0598377
2012-09-01	41.5813	-47	116.977	43.9006	-73.0768	-90.9433	0.0426334

## Sheet: Snake
Year	Month	Label	Q	TWS	Reservoir	Soil	Snow	TWS_f
2003	1	2003-01-01	5.23072	-35	0.108968	-32.3447	13.001	-15.7653
2003	2	2003-02-01	4.72837	57	0.14	-10.5275	22.7149	44.6726
2003	3	2003-03-01	5.29887	47	0.169032	-1.54742	26.6513	21.7271
2003	4	2003-04-01	5.37527	76	0.185667	12.1055	7.20684	56.502
2003	5	2003-05-01	7.22419	22	0.169355	18.2956	-13.9803	17.5154
2003	6	2003-06-01	5.90703	NaN	0.1156	-17.0544	-21.39	NaN
2003	7	2003-07-01	3.42638	-47	0.0594516	-52.0011	-21.5871	26.5288
2003	8	2003-08-01	3.90302	-89	0.0207484	-70.4067	-21.5872	2.9732
2003	9	2003-09-01	4.07845	-108	0.00433	-78.0327	-21.5791	-8.39251
2003	10	2003-10-01	4.47678	-131	0.00835161	-85.8552	-21.4946	-23.6585
2003	11	2003-11-01	4.36535	-110	0.0353667	-81.2425	-11.7349	-17.058
2003	12	2003-12-01	4.43419	-59	0.0663871	-56.1538	8.07429	-10.9869
2003	1	2004-01-01	4.31066	18	0.0956452	-39.5393	50.7916	6.65201
2003	2	2004-02-01	4.67066	44	0.124138	-23.3831	62.9248	4.33418
2003	3	2004-03-01	6.59378	66	0.155806	5.70722	38.856	21.281
2003	4	2004-04-01	4.95069	29	0.172667	15.3895	-6.78572	20.2235
2003	5	2004-05-01	5.57575	26	0.142903	3.4304	-19.6634	42.0901
2003	6	2004-06-01	4.77756	31	0.1243	-12.0022	-21.3404	64.2183
2003	7	2004-07-01	3.42766	-40	0.0712903	-43.4351	-21.5869	24.9507
2003	8	2004-08-01	3.71645	-100	0.0245161	-65.5061	-21.5859	-12.9326
2003	9	2004-09-01	3.85379	-81	0.00661	-67.9431	-21.5679	8.50438
2003	10	2004-10-01	4.45123	-80	0.0163871	-61.5502	-20.878	2.41184
2003	11	2004-11-01	4.23756	-53	0.0511	-31.8452	-17.9235	-3.28242
2003	12	2004-12-01	4.2851	-37	0.0846452	-16.729	-3.6393	-16.7164
2003	1	2005-01-01	4.07979	18	0.117419	-3.6508	25.8331	-4.29969
2003	2	2005-02-01	3.63496	19	0.147143	8.51774	26.4713	-16.1362
2003	3	2005-03-01	4.62161	22	0.176452	23.5738	15.4477	-17.1979
2003	4	2005-04-01	4.4684	42	0.199	39.8736	2.9296	-1.00221
2003	5	2005-05-01	8.255	58	0.207419	65.6787	-16.9935	9.1074
2003	6	2005-06-01	4.74046	30	0.206	52.5826	-21.3003	-1.48838
2003	7	2005-07-01	3.61039	-34	0.142581	0.360723	-21.5866	-12.9167
2003	8	2005-08-01	3.47025	-45	0.0733871	-35.335	-21.5854	11.847
2003	9	2005-09-01	3.78454	-102	0.0278333	-51.28	-21.5745	-29.1733
2003	10	2005-10-01	4.62161	-88	0.0284839	-44.6921	-21.5101	-21.8263
2003	11	2005-11-01	4.75695	-73	0.0624	-27.27	-13.6831	-32.1093
2003	12	2005-12-01	5.43092	-7	0.0962581	-7.34138	11.9919	-11.7468
2003	1	2006-01-01	7.84608	41	0.136774	44.4939	43.355	-46.9857
2003	2	2006-02-01	7.72544	112	0.17	58.56	64.8255	-11.5555
2003	3	2006-03-01	12.2206	117	0.192903	76.7772	59.1691	-19.1392
2003	4	2006-04-01	23.6157	136	0.2124	108.115	35.2777	-7.60502
2003	5	2006-05-01	18.9124	103	0.220323	90.8434	-7.15234	19.0886
2003	6	2006-06-01	8.40505	64	0.215667	54.0237	-20.9913	30.752
2003	7	2006-07-01	4.907	0	0.156774	1.74151	-21.5873	19.6891
2003	8	2006-08-01	4.49808	-46	0.0808387	-34.7115	-21.585	10.2157
2003	9	2006-09-01	4.58794	-69	0.0397	-46.6349	-21.5566	-0.848183
2003	10	2006-10-01	4.94107	-67	0.0459355	-35.9152	-21.0215	-10.1092
2003	11	2006-11-01	4.60855	-30	0.0892333	-20.9504	-13.7776	4.63873
2003	12	2006-12-01	5.2222	-14	0.130323	-2.44911	2.88195	-14.5632
2003	1	2007-01-01	5.33721	31	0.156452	12.1073	25.3931	-6.65684
2003	2	2007-02-01	4.86687	58	0.179643	21.5495	26.7427	9.52808
2003	3	2007-03-01	5.71631	57	0.21129	34.4675	22.3806	-0.0594373
2003	4	2007-04-01	4.88474	61	0.23	39.3598	1.37492	20.0353
2003	5	2007-05-01	5.09868	61	0.200645	25.1641	-17.0368	52.672
2003	6	2007-06-01	3.61677	32	0.152333	-2.56841	-21.3836	55.7996
2003	7	2007-07-01	3.61422	-49	0.0806774	-40.6686	-21.5876	13.1755
2003	8	2007-08-01	3.7254	-70	0.0260903	-61.7195	-21.586	13.2794
2003	9	2007-09-01	3.89089	-95	0.000927533	-68.9791	-21.5697	-4.45209
2003	10	2007-10-01	4.6429	-108	0.0139032	-52.0897	-21.2244	-34.6998
2003	11	2007-11-01	4.43955	-67	0.0475667	-34.8338	-17.7426	-14.4711
2003	12	2007-12-01	4.60883	-29	0.0803871	-21.7825	-0.312705	-6.98514
2003	1	2008-01-01	4.32344	37	0.109581	-12.1037	38.2865	10.7076
2003	2	2008-02-01	4.01661	85	0.136897	1.21141	74.0165	9.63517
2003	3	2008-03-01	5.74613	82	0.166774	27.9526	58.3798	-4.49919
2003	4	2008-04-01	5.72565	81	0.181667	38.793	41.1466	0.878786
2003	5	2008-05-01	9.38804	72	0.171613	34.577	-4.53492	41.7863
2003	6	2008-06-01	7.30031	35	0.183333	20.153	-20.6493	35.313
2003	7	2008-07-01	4.40011	-39	0.133161	-25.7785	-21.5839	8.22919
2003	8	2008-08-01	4.5066	-73	0.0686774	-53.7591	-21.5865	2.27694
2003	9	2008-09-01	4.11348	-86	0.0343	-65.1029	-21.5815	0.650044
2003	10	2008-10-01	4.74513	-78	0.0428387	-55.8832	-21.0106	-1.14901
2003	11	2008-11-01	4.49313	-63	0.0823333	-33.5275	-18.312	-11.2428
2003	12	2008-12-01	4.349	-26	0.115484	-26.8788	0.122591	0.640743
2003	1	2009-01-01	4.35752	17	0.146774	-3.90165	43.7564	-23.0015
2003	2	2009-02-01	3.70537	28	0.178571	13.3949	39.6462	-25.2197
2003	3	2009-03-01	5.15831	73	0.210323	36.7224	29.516	6.55127
2003	4	2009-04-01	8.2855	87	0.226333	49.4765	13.8695	23.4277
2003	5	2009-05-01	10.2399	73	0.229355	50.8017	-12.5986	34.5676
2003	6	2009-06-01	10.3589	51	0.225333	50.1016	-21.4421	22.1152
2003	7	2009-07-01	6.13801	-5	0.205161	14.25	-21.5871	2.13192
2003	8	2009-08-01	4.24975	-31	0.140323	-20.2813	-21.5862	10.7272
2003	9	2009-09-01	4.21695	-76	0.0911667	-42.0206	-21.5842	-12.4864
2003	10	2009-10-01	5.26054	-51	0.0895161	-34.8686	-20.88	4.65907
2003	11	2009-11-01	4.72397	-53	0.123667	-25.3837	-17.8408	-9.89916
2003	12	2009-12-01	5.10294	-34	0.152258	-17.814	-6.20373	-10.1346
2003	1	2010-01-01	5.6013	-11	0.176774	-0.587944	16.4996	-27.0884
2003	2	2010-02-01	4.90535	30	0.198214	17.0264	28.9719	-16.1965
2003	3	2010-03-01	5.85688	64	0.220645	39.9725	13.0604	10.7465
2003	4	2010-04-01	5.69268	35	0.23	53.4593	-1.16372	-17.5256
2003	5	2010-05-01	7.04955	55	0.213548	55.92	-17.4467	16.3131
2003	6	2010-06-01	10.6392	56	0.214333	52.2973	-21.3787	24.8671
2003	7	2010-07-01	4.23782	5	0.186774	4.98773	-21.5869	21.4124
2003	8	2010-08-01	3.70666	-50	0.121871	-27.3664	-21.5866	-1.16889
2003	9	2010-09-01	4.20871	-63	0.0694333	-41.4493	-21.5828	-0.0373585
2003	10	2010-10-01	5.14127	-74	0.0572258	-39.8199	-21.2241	-13.0132
2003	11	2010-11-01	4.76932	-44	0.0908667	-14.9894	-12.0547	-17.0468
2003	12	2010-12-01	5.06034	0	0.126774	14.5059	26.4408	-41.0734
2003	1	2011-01-01	7.5181	NaN	0.151613	40.7282	56.5395	NaN
2003	2	2011-02-01	6.16727	79	0.160357	56.9738	60.0649	-38.199
2003	3	2011-03-01	9.65639	110	0.173548	82.5205	61.23	-33.924
2003	4	2011-04-01	17.4902	141	0.200667	107.921	51.7428	-18.8642
2003	5	2011-05-01	22.1752	168	0.216774	117.623	15.0506	35.1093
2003	6	2011-06-01	19.2545	NaN	0.22	104.287	-15.9742	NaN
2003	7	2011-07-01	8.10166	81	0.229677	43.048	-21.4769	59.1993
2003	8	2011-08-01	5.63112	25	0.205806	-0.662511	-21.587	47.0438
2003	9	2011-09-01	6.45115	-45	0.134	-25.7104	-21.5844	2.16082
2003	10	2011-10-01	8.37427	-14	0.0936129	-13.2734	-21.4785	20.6583
2003	11	2011-11-01	7.11894	-17	0.105233	-8.06235	-13.7317	4.68884
2003	12	2011-12-01	6.85361	2	0.122903	-4.18995	-3.98359	10.0506
2003	1	2012-01-01	6.70453	28	0.140645	10.5835	15.2684	2.00745
2003	2	2012-02-01	5.81717	76	0.171034	32.8556	32.9823	9.99103
2003	3	2012-03-01	9.4136	78	0.200968	49.7232	27.0198	1.05608
2003	4	2012-04-01	13.1538	136	0.219	61.8039	-4.34757	78.3247
2003	5	2012-05-01	10.7341	NaN	0.211613	49.8251	-19.7416	NaN
2003	6	2012-06-01	6.26978	87	0.162667	20.1796	-21.5606	88.2183
2003	7	2012-07-01	4.33622	4	0.0844516	-19.9828	-21.5878	45.4861
2003	8	2012-08-01	3.86596	-30	0.0468387	-48.8611	-21.5873	40.4015
2003	9	2012-09-01	4.22519	-56	0.0226	-64.1637	-21.5864	29.7274

## Sheet: SnakeRiver
Date	SNK.R	SNK.TWS	SNK.GWSA	SNK.sub	SNK.SM	SNK.SWE	SNK.res
2003-10-01	4.47678	-131	-10.4416	-96.4298	-85.8552	-34.5786	-0.124622
2003-11-01	4.36535	-110	-2.96122	-84.3367	-81.2425	-25.6987	-0.0976073
2003-12-01	4.43419	-59	0.0144751	-56.2723	-56.1538	-2.7941	-0.0665869
2004-01-01	4.31066	18	9.01204	-30.6602	-39.5393	48.5646	-0.0373288
2004-02-01	4.67066	44	-1.23919	-24.7553	-23.3831	68.6312	-0.00883602
2004-03-01	6.59378	66	7.1732	12.7475	5.70722	53.0967	0.0228325
2004-04-01	4.95069	29	9.29491	24.5514	15.3895	4.27589	0.0396927
2004-05-01	5.57575	26	43.7226	47.02	3.4304	-21.1629	0.00992928
2004-06-01	4.77756	31	74.5124	62.3772	-12.0022	-31.5015	-0.00867395
2004-07-01	3.42766	-40	38.1215	-5.4466	-43.4351	-34.6247	-0.0616836
2004-08-01	3.71645	-100	0.238741	-65.4003	-65.5061	-34.6242	-0.108458
2004-09-01	3.85379	-81	21.6846	-46.3914	-67.9431	-34.6152	-0.126364
2004-10-01	4.45123	-80	14.937	-46.7461	-61.5502	-33.2703	-0.116587
2004-11-01	4.23756	-53	7.72008	-24.2581	-31.8452	-28.793	-0.081874
2004-12-01	4.2851	-37	-7.57181	-24.4337	-16.729	-12.6509	-0.0483288
2005-01-01	4.07979	18	3.08107	-0.702703	-3.6508	18.5853	-0.0155546
2005-02-01	3.63496	19	-14.4363	-6.05153	8.51774	24.9044	0.0141689
2005-03-01	4.62161	22	-21.0098	2.43096	23.5738	19.3926	0.0434777
2005-04-01	4.4684	42	-6.07319	33.6674	39.8736	8.13355	0.066026
2005-05-01	8.255	58	11.5749	77.1206	65.6787	-19.328	0.0744454
2005-06-01	4.74046	30	10.3257	62.7754	52.5826	-32.9814	0.073026
2005-07-01	3.61039	-34	0.254233	0.481982	0.360723	-34.6246	0.00960669
2005-08-01	3.47025	-45	25.0186	-10.4494	-35.335	-34.6239	-0.0595869
2005-09-01	3.78454	-102	-15.9963	-67.4093	-51.28	-34.6185	-0.105141
2005-10-01	4.62161	-88	-9.11715	-53.9422	-44.6921	-34.0863	-0.10449
2005-11-01	4.75695	-73	-21.4866	-48.8896	-27.27	-24.1728	-0.070574
2005-12-01	5.43092	-7	-5.2866	-12.761	-7.34138	5.66469	-0.0367159
2006-01-01	7.84608	41	-53.344	-8.98304	44.4939	49.8463	0.00380024
2006-02-01	7.72544	112	-26.1786	32.2485	58.56	79.5815	0.037026
2006-03-01	12.2206	117	-40.5904	36.0538	76.7772	80.7533	0.0599293
2006-04-01	23.6157	136	-30.5019	77.48	108.115	58.3076	0.079426
2006-05-01	18.9124	103	13.4767	104.187	90.8434	-1.40742	0.0873486
2006-06-01	8.40505	64	42.2205	96.1112	54.0237	-32.3269	0.0826927
2006-07-01	4.907	0	32.8596	34.4681	1.74151	-34.6249	0.0238002
2006-08-01	4.49808	-46	23.3874	-11.4571	-34.7115	-34.6238	-0.0521352
2006-09-01	4.58794	-69	12.3377	-34.4302	-46.6349	-34.6095	-0.093274
2006-10-01	4.94107	-67	2.84426	-33.2039	-35.9152	-33.842	-0.0870385
2006-11-01	4.60855	-30	19.2142	-1.86919	-20.9504	-28.22	-0.0437406
2006-12-01	5.2222	-14	-10.158	-12.7401	-2.44911	-1.39027	-0.00265137
2007-01-01	5.33721	31	-22.4961	-10.5218	12.1073	41.3653	0.0234777
2007-02-01	4.86687	58	-35.6363	-14.2198	21.5495	72.0401	0.0466689
2007-03-01	5.71631	57	-44.4049	-10.0704	34.4675	66.8591	0.0783164
2007-04-01	4.88474	61	-24.813	14.4138	39.3598	46.3562	0.097026
2007-05-01	5.09868	61	32.1179	57.149	25.1641	3.65036	0.0676712
2007-06-01	3.61677	32	60.5721	57.8707	-2.56841	-26.023	0.0193594
2007-07-01	3.61422	-49	26.3459	-14.4556	-40.6686	-34.6251	-0.0522965
2007-08-01	3.7254	-70	26.4506	-35.4018	-61.7195	-34.6243	-0.106884
2007-09-01	3.89089	-95	8.72729	-60.3848	-68.9791	-34.6161	-0.132046
2007-10-01	4.6429	-108	-21.8478	-74.0704	-52.0897	-33.9435	-0.119071
2007-11-01	4.43955	-67	-1.87822	-36.845	-34.8338	-30.2026	-0.0854073
2007-12-01	4.60883	-29	-4.17727	-26.0928	-21.7825	-2.9876	-0.0525869
2008-01-01	4.32344	37	1.31511	-10.9216	-12.1037	47.812	-0.0233933
2008-02-01	4.01661	85	-11.8923	-10.8139	1.21141	95.677	0.0039226
2008-03-01	5.74613	82	-30.8451	-3.02544	27.9526	84.8587	0.0338002
2008-04-01	5.72565	81	-23.5837	15.0763	38.793	65.742	0.0486927
2008-05-01	9.38804	72	28.983	63.4271	34.577	8.40129	0.038639
2008-06-01	7.30031	35	40.9526	60.9726	20.153	-26.1559	0.0503594
2008-07-01	4.40011	-39	21.4015	-4.50999	-25.7785	-34.6232	0.00018734
2008-08-01	4.5066	-73	15.4479	-38.4442	-53.7591	-34.6245	-0.0642965
2008-09-01	4.11348	-86	13.8235	-51.4123	-65.1029	-34.622	-0.098674
2008-10-01	4.74513	-78	11.8099	-44.2063	-55.8832	-33.8365	-0.0901352
2008-11-01	4.49313	-63	0.0654195	-33.5951	-33.5275	-29.4872	-0.0506406
2008-12-01	4.349	-26	7.66626	-19.3455	-26.8788	-6.76995	-0.0174901
2009-01-01	4.35752	17	-25.6591	-29.6937	-3.90165	46.5469	0.0138002
2009-02-01	3.70537	28	-39.4323	-26.1704	13.3949	53.9919	0.0455975
2009-03-01	5.15831	73	-14.2265	22.3629	36.7224	50.4268	0.0773486
2009-04-01	8.2855	87	-1.67336	47.6702	49.4765	39.1035	0.0933594
2009-05-01	10.2399	73	21.7325	72.4012	50.8017	0.369432	0.0963809
2009-06-01	10.3589	51	30.8584	80.827	50.1016	-30.0523	0.0923594
2009-07-01	6.13801	-5	15.3026	29.4196	14.25	-34.6248	0.0721873
2009-08-01	4.24975	-31	23.8983	3.48403	-20.2813	-34.6244	0.00734863
2009-09-01	4.21695	-76	0.68574	-41.4678	-42.0206	-34.6233	-0.0418073
2009-10-01	5.26054	-51	15.1833	-19.8183	-34.8686	-31.2713	-0.0434578
2009-11-01	4.72397	-53	0.144662	-25.372	-25.3837	-27.7516	-0.00930728
2009-12-01	5.10294	-34	-5.27221	-23.2191	-17.814	-10.9331	0.0192841
2010-01-01	5.6013	-11	-34.3744	-35.0953	-0.587944	23.9185	0.0438002
2010-02-01	4.90535	30	-34.7463	-17.8529	17.0264	47.6547	0.0652403
2010-03-01	5.85688	64	-7.25909	32.5804	39.9725	31.199	0.0876712
2010-04-01	5.69268	35	-33.6432	19.6831	53.4593	15.0869	0.097026
2010-05-01	7.04955	55	9.054	64.8411	55.92	-10.0546	0.0805744
2010-06-01	10.6392	56	32.6419	84.8063	52.2973	-29.0206	0.0813594
2010-07-01	4.23782	5	34.5832	39.4379	4.98773	-34.6247	0.0538002
2010-08-01	3.70666	-50	12.0021	-15.4973	-27.3664	-34.6245	-0.011103
2010-09-01	4.20871	-63	13.1355	-28.4468	-41.4493	-34.6227	-0.0635406
2010-10-01	5.14127	-74	-0.161076	-40.1139	-39.8199	-33.9433	-0.0757481
2010-11-01	4.76932	-44	-10.1099	-25.2323	-14.9894	-18.8586	-0.0421073
2010-12-01	5.06034	0	-42.8888	-28.5159	14.5059	28.3891	-0.00619976
2011-01-01	7.5181	40	-44.0456	-21.0901	40.7282	60.9385	0.018639
2011-02-01	6.16727	79	-45.2024	11.6384	56.9738	67.2012	0.0273832
2011-03-01	9.65639	110	-54.8448	27.5427	82.5205	82.2838	0.0405744
2011-04-01	17.4902	141	-47.5286	60.2592	107.921	80.5402	0.0676927
2011-05-01	22.1752	168	4.59877	122.089	117.623	45.694	0.0838002
2011-06-01	19.2545	124.5	47	128.598	104.287	-4.31835	0.087026
2011-07-01	8.10166	81	70.425	113.34	43.048	-32.5697	0.0967035
2011-08-01	5.63112	25	60.2145	59.419	-0.662511	-34.6248	0.0728325
2011-09-01	6.45115	-45	15.3329	-10.5106	-25.7104	-34.6234	0.00102605
2011-10-01	8.37427	-14	32.8833	19.4769	-13.2734	-33.5705	-0.039361
2011-11-01	7.11894	-17	14.7872	6.59188	-8.06235	-23.6971	-0.0277406
2011-12-01	6.85361	2	19.0231	14.7001	-4.18995	-12.823	-0.0100707
2012-01-01	6.70453	28	6.10589	16.5564	10.5835	11.303	0.00767121
2012-02-01	5.81717	76	4.4464	37.1691	32.8556	38.6599	0.0380605
2012-03-01	9.4136	78	-14.4698	35.1204	49.7232	42.6786	0.0679938
2012-04-01	13.1538	136	60.6151	122.286	61.8039	13.495	0.086026
2012-05-01	10.7341	111.5	76.2983	125.99	49.8251	-14.702	0.078639
2012-06-01	6.26978	87	97.4023	117.449	20.1796	-30.6115	0.0296927
2012-07-01	4.33622	4	58.6564	38.5407	-19.9828	-34.6251	-0.0485223
2012-08-01	3.86596	-30	53.5721	4.57804	-48.8611	-34.6249	-0.0861352
2012-09-01	4.22519	-56	42.8985	-21.3982	-64.1637	-34.6244	-0.110374

## Sheet: DALLES correlation
		Month	Q	TWS	Reservoir	Soil	Snow	TWS_f
correlation	Month	1
	Q	-0.293623	1
	TWS	-0.684527	0.686622	1
	Reservoir	0.340846	-0.106238	-0.471308	1
	Soil	-0.658268	0.694773	0.999372	-0.470115	1
	Snow	-0.677447	0.0199373	0.668387	-0.668637	0.65726	1
	TWS_f	0.0752716	0.754033	0.271478	0.335182	0.284021	-0.533956	1
		Month	Q	TWS	Reservoir	Soil	Snow	TWS_f
p - value	Month	1
	Q	0.002041	1
	TWS	3.13865e-16	2.34819e-16	1
	Reservoir	0.000306577	0.273818	2.62964e-07	1
	Soil	9.81233e-15	7.4159e-17	1.33055e-155	2.84532e-07	1
	Snow	8.22259e-16	0.837725	2.71393e-15	2.62749e-15	1.11226e-14	1
	TWS_f	0.438788	4.55335e-21	0.00448277	0.000391236	0.00289292	2.66633e-09	1

## Sheet: UPC correlation 
		Month	Q	TWS	Reservoir	Soil	Snow	TWS_f
correlation	Month	1
	Q	0.0162805	1
	TWS	-0.661848	0.332718	1
	Reservoir	0.340846	0.29545	-0.453686	1
	Soil	-0.502324	0.486044	0.773254	-0.212963	1
	Snow	-0.668519	-0.340393	0.684243	-0.66457	0.307204	1
	TWS_f	0.378054	0.680141	-0.0748241	0.477005	-0.027204	-0.705383	1
		Month	Q	TWS	Reservoir	Soil	Snow	TWS_f
p - value	Month	1
	Q	0.867186	1
	TWS	6.26245e-15	0.00043437	1
	Reservoir	0.000306577	0.00190738	8.1759e-07	1
	Soil	3.03889e-08	9.68692e-08	1.06111e-22	0.0269066	1
	Snow	2.668e-15	0.000312667	3.26415e-16	4.43281e-15	0.00122076	1
	TWS_f	5.48574e-05	5.718e-16	0.441522	1.79729e-07	0.779881	1.55986e-17	1

[truncated: 7 more sheets: SNK correlation, Graphs, Fires, Graph2, Graphs3, Sheet3, Sheet1]
